1 **TITLE:** *Tetrahymena* Poc5 is a transient basal body component that is important for basal  
2 body maturation

3

4 **RUNNING TITLE:** *Tetrahymena* Poc5 in basal bodies

5

6 **AUTHORS:** Westley Heydeck<sup>a</sup>, Brian A. Bayless<sup>b</sup>, Alexander J. Stemm-Wolf<sup>c</sup>, Eileen T.  
7 O'Toole<sup>a</sup>, Courtney Ozzello<sup>a</sup>, Marina Nguyen<sup>b</sup>, and Mark Winey<sup>b</sup>

8

9 **AFFILIATIONS:** Department of Molecular, Cellular, and Developmental Biology, University of  
10 Colorado, Boulder, CO 80309<sup>a</sup>; Department of Molecular and Cellular Biology, University of  
11 California, Davis, CA 95616<sup>b</sup>; Department of Cell and Developmental Biology, University of  
12 Colorado School of Medicine, Aurora, CO 80045<sup>c</sup>

13

14 **CORRESPONDING AUTHOR:**

15 Mark Winey

16 Department of Molecular and Cellular Biology

17 mwiney@ucdavis.edu

18 (530)752-6778

19

20 **SUMMARY STATEMENT:** Loss of *Tetrahymena thermophila* Poc5 reveals an important role  
21 for this centrin-binding protein in basal body maturation, which also impacts basal body  
22 production and ciliogenesis.

23

24 **KEYWORDS:** Basal body, centriole, centrin, Poc5, *Tetrahymena*, electron tomography

25

26

27

28

29

30

31

## 32 **ABSTRACT**

33 Basal bodies (BBs) are microtubule-based organelles that template and stabilize cilia at the  
34 cell surface. Centrioles ubiquitously associate with BBs and function in BB assembly,  
35 maturation, and stability. Human POC5 (hPOC5) is a highly conserved centriole-binding protein  
36 that binds centrioles through Sfi1p-like repeats and is required for building full-length, mature  
37 centrioles. Here, we use the BB-rich cytoskeleton of *Tetrahymena thermophila* to characterize  
38 Poc5 BB functions. *Tetrahymena* Poc5 (TtPoc5) uniquely incorporates into assembling BBs  
39 and is then removed from mature BBs prior to ciliogenesis. Complete genomic knockout of  
40 *TtPOC5* leads to a significantly increased production of BBs yet a markedly reduced ciliary  
41 density, both of which are rescued by reintroduction of TtPoc5. A second *Tetrahymena POC5*-  
42 like gene, *SFR1*, is similarly implicated in modulating BB production. When *TtPOC5* and *SFR1*  
43 are co-deleted, cell viability is compromised, and levels of BB overproduction are exacerbated.  
44 Overproduced BBs display defective transition zone formation and a diminished capacity for  
45 ciliogenesis. This study uncovers a requirement for Poc5 in building mature BBs, providing a  
46 possible functional link between *hPOC5* mutations and impaired cilia.

47

## 48 **INTRODUCTION**

49 Centrioles and basal bodies (BBs) are evolutionarily ancient, microtubule-based organelles  
50 that nucleate and organize microtubules into specific arrangements for fundamental cellular  
51 processes (Carvalho-Santos et al., 2011; Hodges et al., 2010; Kobayashi and Dynlacht, 2011).  
52 During cell division, microtubule arrays emanating from centriole-comprised centrosomes  
53 function to assemble and organize the mitotic spindle for cellular control of chromosome  
54 segregation. BBs are structurally similar to centrioles, and in some cell types centrioles and  
55 BBs are interconverted as a function of the cell cycle; however, BBs are distinctly required for  
56 templating, orienting, and anchoring cilia and flagella at the cell surface. Depending on the cell  
57 type, cilia and flagella have central roles in diverse mechanical and sensory functions,  
58 including generating directional fluid flow for cell motility and normal left-right axis  
59 determination, as well as coordinating several important signal transduction pathways  
60 (Ishikawa and Marshall, 2011; Nachury and Mick, 2019; Nonaka et al., 1998). In humans, cilia  
61 are present on almost all cell types and ciliary dysfunction is associated with complex  
62 disorders known as ciliopathies, which display a broad spectrum of clinical features reflective

63 of the ubiquity and functional diversity of cilia (Badano et al., 2006; Waters and Beales, 2011).  
64 Further, investigating ciliopathies has solidified the importance of the cilium-associated BB for  
65 ciliary function, as many genetic mutations underlying ciliopathies encode defective BB  
66 proteins as well as proteins that reside and function in both BBs and centrioles (Reiter and  
67 Leroux, 2017).

68 The characteristic cylindrical structure of centrioles and BBs is primarily composed of a  
69 nine-fold, radially symmetric arrangement of specialized triplet microtubules. The definitive  
70 nine-fold internal symmetry is imparted during early assembly by the proximal cartwheel  
71 structure, which consists of nine spokes radiating from a central hub, with the tip of each spoke  
72 typically containing a set of triplet microtubules (Guichard et al., 2018; Hirono, 2014; Kilburn et  
73 al., 2007). As centrioles and BBs mature, these structures become polarized with an apparent  
74 transition from triplet-to-doublet microtubules occurring at the distal end, as well as the variable  
75 acquisition of subdistal and distal appendages (Pearson, 2014; Tanos et al., 2013). Doublet  
76 microtubules of the ciliary axoneme originate from the distal end of a mature BB, in a region  
77 known as the transition zone (TZ), which is an important subdomain for initiating the  
78 compartmentalization of the cilium during early assembly and maintaining a distinct ciliary  
79 protein composition (Garcia-Gonzalo and Reiter, 2017; Gonçalves and Pelletier, 2017). Thus,  
80 a mature TZ is required for ciliary assembly and maintained ciliary function, and a significant  
81 number of ciliopathy-associated proteins localize to and function in the TZ (Reiter and Leroux,  
82 2017).

83 Centriole and BB duplication is a tightly regulated process generally coupled with the  
84 cell cycle, to ensure that constant numbers of these structures are maintained after cell  
85 division for specific cellular requirements (Firat-Karalar and Stearns, 2014; Gönczy, 2012;  
86 Pearson and Winey, 2009). To maintain constant centriole and BB numbers, duplication  
87 occurs only once per cell cycle and new assembly is typically limited to only one site on a  
88 preexisting structure. This assembly process differs in multiciliated cells, where the requisite  
89 near-simultaneous assembly of BBs occurs during differentiation and proceeds by multiple  
90 BBs forming on a preexisting, template BB as well as by *de novo* assembly around a  
91 deuterosome (Brooks and Wallingford, 2014; Dawe et al., 2007; Yan et al., 2016). Notably,  
92 numerous studies in diverse model systems have elucidated a strong evolutionary  
93 conservation of core molecules that regulate duplication of these structures, including

94 molecular assembly factors with shared functions across assembly pathways (Rodrigues-  
95 Martins et al., 2008; Strnad and Gönczy, 2008; Vladar and Stearns, 2007).

96 Centriins are small calcium-binding proteins that are widely conserved in microtubule-  
97 organizing centers including the yeast spindle pole body (yeast centrosome), centrioles, and  
98 BBs, where enrichment in centrioles and BBs is found at both the site of new assembly and in  
99 the distal portion of these structures (Baum et al., 1986; Kilburn et al., 2007; Laoukili et al.,  
100 2000; Paoletti et al., 1996a; Alexander J Stemm-Wolf et al., 2005; Vonderfecht et al., 2012).  
101 While the role of centriins in centrosome duplication is less understood, centriins have key  
102 functions that contribute to BB duplication and maintenance, including roles in BB assembly,  
103 maturation, separation, and stability (Koblenz et al., 2003; Ruiz et al., 2005; Alexander J  
104 Stemm-Wolf et al., 2005; Vonderfecht et al., 2011, 2012). Further, defective ciliary assembly  
105 and function, as well as an array of ciliopathy-like phenotypes, have been observed in mouse  
106 and zebrafish studies of centriin depletion (Delaval et al., 2011; Ying et al., 2019, 2014).  
107 Notably, centriins also perform non-centrosomal functions, including roles in DNA damage  
108 repair, mRNA export, and fibroblast growth factor-mediated signaling (Dantas et al., 2011;  
109 Nishi et al., 2005; Shi et al., 2015).

110 An interaction between centriin and centrosomal Sfi1p is required for duplication of the  
111 yeast spindle pole body and in mammalian cells, the mammalian ortholog of SFI1 promotes  
112 centriole duplication (Kilmartin, 2003; Kodani et al., 2019). Structural studies of Sfi1 uncovered  
113 centriin-binding repeats (CBRs) that each contain a conserved sequence motif,  
114 Ax7LLx3F/Lx2WK/R, that directly binds the C-terminus of centriin (Kilmartin, 2003; Li et al.,  
115 2006; Martinez-Sanz et al., 2010, 2006). This conserved motif enabled the identification of  
116 centriin-binding proteins across eukaryotes that contain centrioles and/or BBs, including five in  
117 humans (Azimzadeh et al., 2009; Eisen et al., 2006; Gogendeau et al., 2007; Heydeck et al.,  
118 2016; Kilmartin, 2003; Stemm-Wolf et al., 2013). The centriin-binding protein, Poc5, was  
119 identified previously in the *Chlamydomonas reinhardtii* centriole proteome and characterized  
120 as an ancestral, core centriolar protein based on broad evolutionary conservation among  
121 eukaryotes (Hodges et al., 2010; Keller et al., 2009). Further, human POC5 (hPOC5) was  
122 found to be enriched in the distal portion of human centrioles, where it has an essential role in  
123 centriole elongation and maturation (Azimzadeh et al., 2009). This role for hPOC5 is notable  
124 because molecular mechanisms that contribute to building a full-length centriole/BB remain

125 poorly understood, especially compared with the mechanistic and molecular understanding of  
126 early assembly (Chang et al., 2016; Chen et al., 2017; Comartin et al., 2013; Keller et al.,  
127 2009; Schmidt et al., 2009). Furthermore, a truncating mutation in *hPOC5* was recently  
128 implicated in an inherited form of retinal degeneration, retinitis pigmentosa, characterized by  
129 progressive loss of photoreceptors, and *Poc5* was found to colocalize with centrin in the  
130 connecting cilium of zebrafish photoreceptors, where it is important for normal retinal  
131 development and function (Weisz Hubshman et al., 2018; Wheway et al., 2014). Additionally,  
132 *hPOC5* mutations associated with adolescent idiopathic scoliosis lead to mislocalization of  
133 *hPOC5*, impaired cell cycle progression, and shorter cilia (Hassan et al., 2019).

134 The ciliate, *Tetrahymena thermophila*, has a microtubule-based cytoskeleton containing  
135 roughly 750 BBs organized along cortical rows and within the feeding structure of the cell, the  
136 oral apparatus (Bayless et al., 2015). Previous *Tetrahymena* studies have provided  
137 fundamental insight on the multiple BB functions of centrins (Kilburn et al., 2007; Alexander J  
138 Stemm-Wolf et al., 2005; Vonderfecht et al., 2011, 2012). Further, members of the large family  
139 of 13 centrin-binding proteins in *Tetrahymena* (Sfr1-13) each localize distinctly to subsets of  
140 cortical row and/or oral apparatus BBs, as well as to specific regions within BBs overlapping  
141 with known patterns of centrin localization (Heydeck et al., 2016; Stemm-Wolf et al., 2013).  
142 Also, centrin-binding proteins have diverse roles in BBs, where Sfr1 and Sfr13 function in  
143 modulating BB production and in separating/stabilizing BBs, respectively. Together, these  
144 findings suggest that centrin-binding proteins may collectively provide the precise  
145 spatiotemporal coordination necessary for centrin to perform multiple BB functions. Despite  
146 the strong evolutionary conservation of *Poc5* in centrioles and BBs, this study provides the first  
147 functional characterization of *Poc5* in BBs. This investigation reveals a dynamic BB  
148 localization pattern for *Tetrahymena Poc5* (TtPoc5) and an essential role for *Poc5* in building a  
149 mature BB capable of nucleating a cilium.

150

## 151 **RESULTS**

### 152 **Identification of TtPoc5 through evolutionarily conserved Poc5 domains.**

153 The hallmark feature of centriole and BB-associated centrin-binding proteins is the presence of  
154 a variable number of CBRs that each contain a conserved sequence motif,  
155 Ax7LLx3F/Lx2WK/R (Kilmartin, 2003; Li et al., 2006). Despite the expanded number of

156 centrin-binding proteins in *Tetrahymena*, mining the *Tetrahymena* genome using solely this  
157 conserved sequence motif within CBRs was not a sufficient method for identifying TtPoc5.  
158 This was primarily due to limited sequence conservation between centrin-binding proteins, as  
159 exemplified by moderate overall sequence homology (mean 16% identity, 29% similarity) even  
160 within the Poc5 family (Azimzadeh et al., 2009). Despite limited overall sequence homology,  
161 Poc5 orthologs can be differentiated from other centrin-binding proteins because they contain  
162 a 21 amino acid (AA) signature sequence motif, known as the Poc5 box, that is both highly  
163 conserved (mean 57% identity, 81% similarity) and uniquely found only in Poc5 orthologs  
164 (Azimzadeh et al., 2009). Using the full protein sequence of hPOC5 to search the  
165 *Tetrahymena* genome, a Poc5 ortholog was identified that shares characteristic Poc5 domain  
166 organization and sequence homology with hPOC5 (overall identities, 68/291 [23%]; positives,  
167 135/291 [46%]) (Fig. 1A). Similar to hPOC5, TtPoc5 (TTHERM\_00079160) has three CBRs  
168 organized as an isolated N-terminal CBR (CBR1) and two CBRs (CBR2,3) in tandem (Fig.  
169 1A,B) (Azimzadeh et al., 2009). Notably, the defining residues of the conserved sequence  
170 motif between the three CBRs of hPOC5 and TtPoc5 are primarily either conserved or their  
171 hydrophobicity is retained despite AA differences, suggesting that the functional centrin-  
172 binding property of TtPoc5 CBRs is likely intact (denoted by asterisks in Fig. 1B, highlighted in  
173 Fig. 1C). Additionally, TtPoc5 contains the characteristic Poc5 box, which exhibits a high  
174 degree of shared sequence homology with hPOC5 (overall identities, 15/21 [71%]; positives,  
175 17/21 [81%]) (Fig. 1B) and with select Poc5 orthologs (Fig. 1D) (Azimzadeh et al., 2009).

176  
177 **TtPoc5 localizes exclusively to assembling BBs.** *Tetrahymena* cells have a highly  
178 organized cytoskeleton with hundreds of BBs maintained along cortical rows as well in the BB-  
179 comprised oral apparatus (Bayless et al., 2015). To determine whether TtPoc5 localizes to  
180 BBs, *Tetrahymena* cells containing endogenously tagged Poc5-GFP and the BB-specific  
181 marker, Poc1-mCherry, were imaged for colocalization (Heydeck et al., 2016; Pearson et al.,  
182 2009; Stemm-Wolf et al., 2013). Endogenous TtPoc5 only colocalized with Poc1 in a subset of  
183 cortical row BBs (highlighted with boxes in Fig. 2A) and was notably absent from the oral  
184 apparatus (arrowheads in Fig. 2A). Notably, live imaging of *Tetrahymena* cells in the GFP  
185 channel captured autofluorescence in large cell vacuoles that was not reflective of Poc5-GFP  
186 signal (Fig. 2A).

187 To dissect further the TtPoc5 BB localization pattern, analysis focused on characterizing  
188 the Poc5-GFP signal relative to Poc1-mCherry in cortical row BBs. In *Tetrahymena*, new BBs  
189 assemble anteriorly from existing, mature BBs in cortical rows and can be identified in closely  
190 adjoining BB pairs (Bayless et al., 2015). Endogenously tagged Poc1-mCherry was used for  
191 this study because it slowly incorporates into assembling BBs and gradually accumulates  
192 during BB maturation, therefore differentiating assembling from mature BBs (Pearson et al.,  
193 2009). Within a representative region of a cortical row containing three BB pairs, Poc5-GFP  
194 resided in assembling BBs and was not detected in mature BBs, marked by prominent Poc1-  
195 mCherry signal (Fig. 2A). Image averaging of Poc5-GFP and Poc1-mCherry signals across 58  
196 BB pairs (representative BB pair in Fig. 2A) consistently detected TtPoc5 exclusively at the  
197 assembling BB (Fig. 2B). Notably, the timing of TtPoc5 incorporation into assembling BBs  
198 appeared to precede that of the slowly incorporated Poc1, since Poc5-GFP was found in  
199 assembling BBs devoid of Poc1-mCherry (arrows in Fig. 2A). Further, the absence of TtPoc5  
200 in mature BBs may signify why Poc5-GFP was not observed in the oral apparatus BBs (Fig.  
201 2A), which contain primarily mature BBs, as indicated by enriched Poc1-mCherry.

202

203 **Dynamic incorporation and removal of TtPoc5 in BBs.** To verify that TtPoc5 localizes  
204 preferentially to assembling BBs, *Tetrahymena* cells with endogenously tagged Poc5-GFP  
205 were cultured in three conditions that elicit different cellular responses to BB assembly and  
206 maintenance: growth medium, starvation medium, and starvation medium followed by release  
207 into growth medium (Fig. 3A). During logarithmic growth, *Tetrahymena* BBs are stabilized for  
208 the entirety of the cell cycle and BB assembly is not synchronous, thus, the majority of cortical  
209 row BBs at any given time are mature with a minimal number of newly assembled BBs  
210 (Bayless et al., 2015; Galati et al., 2015). In growth, Poc5-GFP was only detected in a small  
211 proportion of cortical row BBs (arrowheads in Fig. 3A), which was consistent with TtPoc5  
212 exclusively residing in assembling BBs (Fig. 2A,B). When *Tetrahymena* cells are shifted from  
213 growth medium into starvation medium, cells arrest in G1 preventing new BB assembly  
214 (Pearson et al., 2009). Under media starvation for 24 hours when only mature BBs persisted,  
215 Poc5-GFP signal was not detected in any cortical row BBs (Fig. 3A). Further, when starved  
216 cells are shifted back into growth medium this releases cells from cell cycle arrest (starve and  
217 release) and correspondingly initiates a synchronous wave of new BB assembly (Pearson et

218 al., 2009). In contrast to the depleted Poc5-GFP signal in starved cells, there was a marked  
219 enrichment of Poc5-GFP-positive BBs during synchronized BB assembly in starved and  
220 released cells (arrowheads in Fig. 3A).

221 To better understand the timing of TtPoc5 BB incorporation relative to early assembly,  
222 cells co-expressing Poc5-GFP and Sas6a-mCherry were used since Sas6a is a critical  
223 component of the early-forming BB cartwheel structure that templates the nine-fold symmetry  
224 of BBs (Culver et al., 2009). In *Tetrahymena*, the cartwheel is a stable structure that persists  
225 from early BB assembly through maturation, therefore Sas6a-mCherry evenly labeled all  
226 cortical row BBs (Fig. 3B) (Bayless et al., 2015). To increase the number of Poc5-GFP-  
227 positive BBs for this analysis, cells were starved and released. Poc5-GFP localized  
228 exclusively to the assembling BBs within BB pairs and Poc5-GFP-positive BBs were always  
229 marked with Sas6a-mCherry (Fig. 3B). Given that Poc5-GFP-positive BBs were never devoid  
230 of Sas6a-mCherry, TtPoc5 BB incorporation preceded that of Poc1 (Fig. 2A) but did not  
231 precede early cartwheel formation (Fig. 3B). Notably, Sas6a-mCherry-positive BBs lacking  
232 any detectable Poc5-GFP were also observed (arrows in Fig. 3B), which are likely mature BBs  
233 where TtPoc5 has been removed.

234 To elucidate the timing of TtPoc5 BB removal relative to BB maturation and the onset of  
235 cilia formation, starved and released cells were used that co-expressed Poc5-GFP, Poc1-  
236 mCherry (BB marker), and a tagged *Tetrahymena* ortholog of the ciliary-specific protein, radial  
237 spoke head 9 (RSPH9-mCherry; gifted by Dr. Chad Pearson) (Yang et al., 2006). As seen in  
238 Fig. 3C, RSPH9-mCherry evenly labelled ciliary axonemes along cortical rows as well as in the  
239 mature oral apparatus, and there was no detected signal overlap with Poc5-GFP in BBs.  
240 Within a representative region of a cortical row (boxed area in Fig. 3C), Poc5-GFP colocalized  
241 with Poc1-mCherry in anteriorly-positioned BBs of pairs (arrowheads in Fig. 3C) but was not  
242 observed in mature BBs with prominent RSPH9-mCherry labelled cilia. The absence of  
243 TtPoc5 in ciliated BBs suggested that TtPoc5 removal from BBs was either prior to or  
244 prompted by the onset of cilia formation (arrowheads in Fig. 3C). In *Tetrahymena*, not all  
245 mature BBs are ciliated, providing an intermediate stage between BB maturation/stabilization  
246 and cilia formation for further dissection of this timing (Bayless et al., 2012; Nanney, 1975,  
247 1971). As shown in Fig. 3C, mature nonciliated Poc1-mCherry-positive BBs were present that  
248 lacked Poc5-GFP signal (denoted with arrows), indicating that TtPoc5 removal occurred prior



249 to the onset of cilia formation. Collectively, TtPoc5 is transiently incorporated into assembling  
250 BBs and is then removed prior to BB maturation, suggesting that TtPoc5 potentially functions  
251 during this dynamic stage of BB development and drawing similarities with the known function  
252 of hPOC5 in centriole elongation/maturation (Azimzadeh et al., 2009).

253

254 **Loss of TtPoc5 leads to overproduced cortical row BBs and a reduction of cilia.** To  
255 determine the BB function(s) of TtPoc5, a complete genomic knockout (KO) strain was  
256 generated by replacing the *TtPOC5* open reading frame (ORF) through homologous  
257 recombination with a high efficiency, codon-optimized NEO2 cassette (coNEO2) built for usage  
258 in *Tetrahymena* and used for positive selection of transformants (Fig. 4A) (Mochizuki, 2008).  
259 The *TtPOC5* KO strain was validated by PCR using isolated genomic DNA from wild-type (WT)  
260 control and *poc5Δ* cells (Fig. 4B). RT-PCR using isolated RNA from WT and *poc5Δ* cells  
261 further confirmed that *poc5Δ* cells lacked *TtPOC5*, revealing expression of *coNEO2* only in  
262 *poc5Δ* cells and expression of *TtPOC5* only in WT cells (Fig. S1).

263 *TtPOC5* is not essential for cell viability given that *poc5Δ* cells persist indefinitely; and  
264 through time-course analysis, *poc5Δ* cells exhibited similar growth rates to WT cells at both an  
265 optimal growth temperature for *Tetrahymena* (30°C) and at a restrictive temperature (37°C)  
266 used to identify temperature-sensitive mutants (Fig. 4C). From a gross morphological  
267 standpoint, *poc5Δ* cells grown at room-temperature (RT), 30°C, and 37°C displayed properly  
268 oriented BBs organized along cortical rows, as well as morphologically normal oral  
269 apparatuses (Fig. 4D). Since BB orientation was maintained in *poc5Δ* cells, the spatial  
270 organization of cortical row BBs in *poc5Δ* and WT cells was assessed by quantifying the BB  
271 density (average BBs/10 μm) along cortical rows (Fig. 4E). Measuring BB density in growing  
272 *Tetrahymena* cells is a powerful method for identifying disrupted BB homeostasis since the  
273 number of cortical row BBs is maintained at a nearly constant number (Frankel, 2008, 1980;  
274 Nanney, 1971, 1968, 1966). At all tested growth temperatures (RT, 30°C, 37°C), *poc5Δ* cells  
275 had a significantly greater cortical row BB density (8.0, 7.8, 8.0 BBs/10 μm, respectively) than  
276 WT cells (6.9, 6.8, 6.9 BBs/10 μm, respectively), suggesting that TtPoc5 potentially functions  
277 to inhibit BB overproduction or that loss of TtPoc5 elicits a compensatory cellular response  
278 leading to BB overproduction (Fig. 4E).

279 To determine that this observed BB overproduction was a direct result of loss of TtPoc5,  
280 a rescue strain was generated that reintroduced *TtPOC5* in *poc5Δ* cells through transformation  
281 of a cadmium-chloride (CdCl<sub>2</sub>)-inducible rescuing construct, *MTT1pr*-GFP-Poc5 (Fig. 4D). To  
282 assess rescue, the BB density was quantified in cells grown at 30°C with no added CdCl<sub>2</sub> (no  
283 induction; N.I.), due to the established leakiness of the *MTT1* promoter (Heydeck et al., 2016;  
284 Shang et al., 2002) and because *MTT1pr*-mCherry-Poc5 exogenously expressed with N.I. in a  
285 WT background localized to cortical row BBs similarly to endogenous Poc5-GFP (Figs. 2A,S2).  
286 Further, CdCl<sub>2</sub>-induced *MTT1pr*-mCherry-Poc5 overexpression led to an aberrant TtPoc5 BB  
287 localization pattern and formation of elongated, Poc5-positive fibers observed previously with  
288 overexpression of Poc5 (arrows in Fig. S2) (Dantas et al., 2013). As seen in Fig. 4D and  
289 quantified in Fig. 4E, *poc5Δ* rescue cells grown at 30°C with N.I. exhibited a reduced BB  
290 density (7.1 BBs/10 μm) to near WT levels (6.8 BBs/10 μm) upon *TtPOC5* reincorporation,  
291 demonstrating that TtPoc5 has a direct function in modulating *Tetrahymena* BB production.  
292 Interestingly, despite the cortical row BB overproduction seen with loss of TtPoc5, *poc5Δ* cells  
293 had fewer ciliated BBs than WT cells (Fig. 4F,G). For this analysis, the ciliary density (average  
294 # of cilia/10 μm) was examined in WT, *poc5Δ*, and *poc5Δ* rescue cells (N.I.) grown at 30°C  
295 with an antibody against polyglutamylation, which marked microtubule glutamylation in both  
296 BBs and cilia (Bayless et al., 2016; Wolff et al., 1992). As shown in Fig. 4F and quantified in  
297 Fig. 4G, *poc5Δ* cells nucleated on average 2.5 cilia/10 μm along cortical rows compared with  
298 3.5 cilia/10 μm in WT cells, and *TtPOC5* reincorporation in *poc5Δ* rescue cells grown at 30°C  
299 with N.I. led to a significantly increased ciliary density (3.3 cilia/10 μm) to near WT levels.  
300 Collectively, phenotypic analysis of *poc5Δ* cells elucidated a direct function for TtPoc5 in  
301 cortical row BB production and uncovered a diminished capacity in *poc5Δ* cells to maintain WT  
302 ciliary density levels despite BB overproduction.

303

304 **Loss of TtPoc5 and Sfr1 results in exacerbated BB overproduction and cell death.** A  
305 potentially antagonistic role for TtPoc5 in modulating BB production is interestingly not unique  
306 for *Tetrahymena* centrin-binding proteins, where the previously characterized loss of Sfr1 led  
307 to a significantly greater BB density (7.9 BBs/10 μm) than in WT cells (6.98 BBs/10 μm)  
308 (Heydeck et al., 2016). Beyond the phenotypic overlap in *poc5Δ* and *sfr1Δ* cells, the BLAST  
309 search that identified TtPoc5 through sequence homology with hPOC5 (described in Fig. 1)

310 identified Sfr1 as the second orthologous hit to hPOC5 (overall identities, 40/172 [23%];  
311 positives, 74/172 [43%]). This shared sequence homology between hPOC5, TtPoc5, and Sfr1  
312 primarily stemmed from a CBR organization that appears to be distinctive to Poc5 orthologs,  
313 with these proteins typically containing 3 CBRs organized as an isolated CBR and two CBRs in  
314 tandem (Fig. 1A) (Azimzadeh et al., 2009; Heydeck et al., 2016; Stemm-Wolf et al., 2013).  
315 Despite this shared CBR organization, the highly conserved Poc5 box that is a hallmark of  
316 Poc5 orthologs (Fig. 1D) is notably absent in Sfr1, therefore TtPoc5 was considered the  
317 primary *Tetrahymena* Poc5 ortholog (Azimzadeh et al., 2009; Heydeck et al., 2016; Stemm-  
318 Wolf et al., 2013).

319 Given the phenotypic overlap in *poc5Δ* and *sfr1Δ* single KO cells and potential  
320 functional redundancy between TtPoc5 and Sfr1, double KO cells lacking both *TtPOC5* and  
321 *SFR1* (*poc5Δ;sfr1Δ* cells) were generated using established methods (Fig. S3) (Hai et al.,  
322 2000; Heydeck et al., 2016). Unlike *poc5Δ* and *sfr1Δ* single KO cells that are viable and  
323 persist indefinitely, *poc5Δ;sfr1Δ* cells are inviable following completed drug selection at 30°C,  
324 suggesting that the overlapping BB function of TtPoc5 and Sfr1 was vital for *Tetrahymena* cell  
325 viability (Fig. 5A) (Heydeck et al., 2016). To test whether the underlying *poc5Δ;sfr1Δ* cell  
326 lethality was due to the unsuccessful transmission of the drug-resistance neomycin cassettes,  
327 cells containing a germline deletion of *TtPOC5* or *SFR1* only in the transcriptionally-silent  
328 micronuclei (heterokaryons) were mated with WT cells to generate a strain heterozygous for  
329 both *TtPOC5* and *SFR1*, resulting in viable cells after 48 hours post drug (Fig. 5A) (Cassidy-  
330 Hanley, 2012; Hai et al., 2000). Further, WT cells lacking drug-resistance cassettes were  
331 mated together to test the efficacy of drug selection, resulting in incomplete drug selection by  
332 24 hours post drug but cell death by 48 hours in drug (Fig. 5A). Thus, *poc5Δ;sfr1Δ* cell death  
333 by 48 hours in drug was due to the combined loss of TtPoc5 and Sfr1, revealing an essential  
334 function for these *Tetrahymena* centrin-binding proteins that was obscured in *poc5Δ* and *sfr1Δ*  
335 single KO cells due to some functional redundancy (Heydeck et al., 2016).

336 To investigate the functional consequences of loss of both TtPoc5 and Sfr1 on BB  
337 production, phenotypic analysis of BB density was conducted after 24 hours in drug at 30°C  
338 when mated WT, double heterozygous, and *poc5Δ;sfr1Δ* cells persisted (Fig. 5A). Notably,  
339 mated WT cells were analyzed in parallel to control for BB rearrangement after mating and a  
340 potentially increased BB density from requisite BB assembly during cell division (Pearson and

341 Winey, 2009). After 24 hours in drug, *poc5Δ;sfr1Δ* cells maintained properly oriented cortical  
342 row BBs and morphologically normal oral apparatuses, similar to what was observed in *poc5Δ*  
343 or *sfr1Δ* single KO cells (Fig. 4D) (Heydeck et al., 2016). As shown in Fig. 5A and quantified in  
344 Fig. 5B, the BB density in *poc5Δ;sfr1Δ* cells was significantly exacerbated (8.7 BBs/10 μm)  
345 compared with double heterozygous (7.2 BBs/10 μm) and mated WT cells (7.4 BBs/10 μm),  
346 while there was a no significant difference in BB density between double heterozygous and  
347 mated WT cells. Furthermore, the BB density in *poc5Δ;sfr1Δ* cells (8.7 BBs/10 μm) exceeded  
348 what was measured in *poc5Δ* cells grown at 30°C (7.8 BBs/10 μm) (Fig. 4E) and in *sfr1Δ* cells  
349 (7.9 BBs/10 μm) (Heydeck et al., 2016). Collectively, the increased cortical row BB  
350 overproduction in *poc5Δ;sfr1Δ* cells revealed functionally redundant roles for TtPoc5 and Sfr1  
351 in BB production. Thus, *poc5Δ;sfr1Δ* cell death may be from an inability to compensate for a  
352 greatly increased level of BB production and consequently BB-dense cortical rows, which  
353 supports the importance of retaining a typical, highly regulated BB number in *Tetrahymena*  
354 (Frankel, 2008, 1980; Nanney, 1971, 1968, 1966).

355 Given that *poc5Δ;sfr1Δ* cells died by 48 hours in drug despite an abundance of BBs  
356 after 24 hours (Fig. 5A,B), an ultrastructural examination using electron microscopy (EM) was  
357 conducted to elucidate potential BB defects driving *poc5Δ;sfr1Δ* cell lethality (Fig. 5C,D). From  
358 cross-sectional views of *poc5Δ;sfr1Δ* cortical row BBs, it was apparent that the proximal  
359 cartwheel structures comprised of radially symmetric arrays of triplet microtubules were intact  
360 (Fig. 5C) (Allen, 1969; Bayless et al., 2015; Hirono, 2014; Kilburn et al., 2007). Additionally,  
361 BB accessory structures that aid in properly orienting and positioning BBs along cortical rows  
362 were also intact, which was not unexpected given the retained BB orientation in *poc5Δ;sfr1Δ*  
363 cells (Fig. 5C) (Bayless et al., 2015; Meehl et al., 2016, p. 1). Contrary to the proximal end of  
364 *poc5Δ;sfr1Δ* BBs, longitudinal views captured BBs docked at the cell surface with varying  
365 degrees of TZ formation at the distal end, suggesting that BB maturation was delayed or  
366 impaired upon loss of both TtPoc5 and Sfr1 (Fig. 5D, see Movie 1). Consequently,  
367 *poc5Δ;sfr1Δ* BBs with aberrant TZs did not template cilia at the cell surface (Fig. 5D) and  
368 lacked distinct TZ/axonemal features, including a transition from triplet-to-doublet microtubules  
369 (MTs), the electron dense axosome, and the central pair of MTs emanating from the axosome  
370 through the ciliary axoneme (Fig. S4, see Movies 2,3) (Bayless et al., 2015; Meehl et al., 2016;  
371 Sattler and Staehelin, 1974). Notably, BBs that templated cilia and exhibited morphologically

372 normal TZs were also observed through EM (arrow marks axosome in Fig. 5D), which may be  
373 inherited BBs that formed prior to the loss of TtPoc5 and Sfr1 or the presence of these BBs  
374 could potentially indicate a dysregulated timing/delay of BB maturation in *poc5Δ;sfr1Δ* cells.  
375 By disrupting the timing of BB maturation and impairing TZ formation, the cortical row BB  
376 overproduction observed in *poc5Δ;sfr1Δ* cells was likely a compensatory response that  
377 resulted in an increased number of immature BBs, a diminished capacity to form cilia, and an  
378 inability to survive by 48 hours.

379

## 380 DISCUSSION

381 In *Tetrahymena*, the tightly controlled timing and positioning of BB assembly, combined with  
382 the stabilization of BBs throughout the cell cycle, establishes a highly organized cytoskeleton  
383 with hundreds of BBs maintained along cortical rows and in the oral apparatus (Bayless et al.,  
384 2015). This intricately patterned and BB-rich cytoskeleton was previously exploited for  
385 characterizing the essential BB functions of centrin, which broadly encompass roles in BB  
386 assembly, orientation, separation, and stability (Kilburn et al., 2007; Alexander J Stemm-Wolf  
387 et al., 2005; Vonderfecht et al., 2011, 2012). Here, TtPoc5 is uniquely incorporated into  
388 assembling cortical row BBs and is then removed from mature BBs prior to the onset of cilia  
389 formation. *Tetrahymena* cells lacking *TtPOC5* are viable yet overproduce cortical row BBs  
390 and, despite this overproduction of BBs, exhibit a significantly reduced number of cilia along  
391 cortical rows. Upon reintroduction of TtPoc5 using an inducible promoter, the cortical row BB  
392 overproduction and reduced ciliary density seen with loss of TtPoc5 were both rescued.  
393 Interestingly, *Tetrahymena* has two *POC5*-like genes, *TtPOC5* and *SFR1*, that share homology  
394 within their CBRs and each encode BB-specific proteins with roles in modulating cortical row  
395 BB production (Heydeck et al., 2016). When *TtPOC5* and *SFR1* are co-deleted, *Tetrahymena*  
396 cells are no longer viable and display exacerbated levels of cortical row BB overproduction.  
397 Further, underlying BB maturation defects are apparent with varying degrees of distal TZ  
398 formation, leading to a consequently diminished capacity to nucleate a cilium. This study  
399 uncovers a specific requirement for Poc5 in building the distal portion of BBs, which  
400 corresponds with the distinct timing of TtPoc5 BB localization and may signify an added  
401 importance of centrin reported at the BB distal end (Kilburn et al., 2007). By revealing this  
402 functional redundancy, the dysregulation of BB number seen with loss of TtPoc5 and/or Sfr1 is

403 likely a cellular response in *Tetrahymena* to compensate for delayed or defective BB  
404 maturation. Additionally, the essential role for TtPoc5 in *Tetrahymena* BB maturation provides  
405 a possible functional explanation for the observed association between *hPOC5* mutations and  
406 impaired cilia (Hassan et al., 2019; Oliazadeh et al., 2017; Patten et al., 2015; Weisz  
407 Hubshman et al., 2018).

408

409 **TtPoc5 is exclusively present in assembling BBs.** In a previous analysis of hPOC5, this  
410 highly conserved centrin-binding protein was found to be recruited to procentrioles in the G2  
411 phase of the cell cycle as procentrioles elongate and mature (Azimzadeh et al., 2009).  
412 Further, hPOC5 was observed in both the daughter and mother centrioles, similarly to centrin,  
413 indicating that once hPOC5 is recruited to procentrioles it is then stably incorporated. In  
414 comparison with hPOC5, this study finds endogenous TtPoc5 exclusively in assembling BBs  
415 after the initial cartwheel structure is formed and removal of TtPoc5 from mature BBs precedes  
416 ciliary assembly (Figs. 2, 3). This dynamic incorporation and removal of TtPoc5 relative to BB  
417 production has not been observed in previous analyses of other centrin-binding proteins,  
418 suggesting that the precise timing of TtPoc5 BB localization and function is important.  
419 Accordingly, overexpressing TtPoc5 using an inducible promoter appears to disrupt this critical  
420 timing, leading to the formation of elongated Poc5-positive fibers and an aberrant BB  
421 localization pattern with TtPoc5 residing in all cortical row BBs (Fig. S2). Interestingly,  
422 overexpression of Sfr1 did not produce Sfr1-positive fibers and Sfr1 was found to be stably  
423 present in all cortical row BBs as well as in the mature BBs within the oral apparatus (Heydeck  
424 et al., 2016). However, the functional significance and extent of this discrepancy in BB  
425 localization patterns is not currently understood primarily because of the technical challenges  
426 of endogenously tagging Sfr1, precluding a direct comparison with endogenous TtPoc5  
427 (Heydeck et al., 2016). Given the stable presence of centrin in both mature BBs and  
428 centrioles, furthering our understanding of the molecular underpinnings driving Poc5 removal  
429 from mature BBs (and not mature centrioles), as well as illuminating the functional importance  
430 of Sfr1 residing in all BBs, will both be interesting to address in future research.

431

432 **Role of TtPoc5 in BB production and *Tetrahymena* BB number constancy.** Beyond the  
433 established role for hPOC5 in centriole elongation/maturation, a Poc5 BB function has not

434 been previously described (Azimzadeh et al., 2009; Chang et al., 2016; Chen et al., 2017;  
435 Comartin et al., 2013). In this study of TtPoc5 BB function, *poc5Δ* cells have a significantly  
436 increased cortical row BB density (Fig. 4E). This increase in BB number through BB  
437 overproduction is notable because *Tetrahymena* cells have an intrinsic capability to maintain a  
438 nearly constant total number of cortical row BBs, by altering the spatial organization of BBs  
439 through changes in the BB density and/or the overall number of cortical rows (Frankel, 2008,  
440 1980; Nanney, 1971, 1968, 1966). The mechanism underlying the regulation of BB number  
441 constancy in *Tetrahymena* has not been elucidated, however, Sfr1 was similarly implicated in  
442 modulating cortical row BB production after observing more densely packed, supernumerary  
443 cortical rows in *sfr1Δ* cells (Heydeck et al., 2016). The absence of both TtPoc5 and Sfr1 leads  
444 to a greater increase in BB number (Fig. 5B), which has not been seen with genetic deletions  
445 of other characterized centrin-binding proteins, and uniquely implicates Poc5 regulating BB  
446 number. Notably, future studies are needed to address the significance of centrin-binding for  
447 Poc5 BB function, as well as the functional relevance of non-centrin interactors, including  
448 known ciliary and cytoskeleton components that bind hPOC5 (Hassan et al., 2019). Further,  
449 the highly conserved Poc5 box does not have a reported function, thus, this additional domain  
450 found only in Poc5 orthologs may specify Poc5 BB function.

451 Although most metazoan cell types lack the cortical organization of BBs that is  
452 characteristic of ciliates, there is a strong evolutionary conservation of molecules that tightly  
453 control both BB and centriole duplication irrespective of cortical organization (Firat-Karalar et  
454 al., 2014; Pearson and Winey, 2009; Rodrigues-Martins et al., 2008). Further, previous  
455 studies have established that centrosome amplification and the underlying deregulation of  
456 centriole number are widespread features of many human cancers (Chan, 2011; Marteil et al.,  
457 2018; Wong et al., 2015). Using a diverse panel of 60 human cancer cell lines derived from  
458 nine distinct tissues (the NCI-60 panel), significant centrosome amplification was evident in all  
459 tissue types and within half of the analyzed cell lines (Marteil et al., 2018). Further, there was  
460 marked variability in the percentage of cells with supernumerary centrioles, indicating that  
461 cancer cell lines possess distinct centriole numbers and levels of centrosome amplification.  
462 Interestingly, hPOC5 is capable of binding both human CETN2 and human CETN3, which  
463 have roles in promoting and antagonizing centrosome duplication, respectively (Sawant et al.,  
464 2015). Thus, depletion of CETN3 in HeLa cells results in a centriole overproduction,

465 suggesting that centrins are important for modulating centriole number and this bidirectional  
466 contribution to centrosome duplication may be impaired in some human cancers. Collectively,  
467 these findings suggest that conserved mechanisms and/or signaling cues that are important for  
468 maintaining both centriole and BB number may exist, of which, Poc5 and centrins are good  
469 candidates for directing this process in metazoans.

470

471 **Requirement for Poc5 in BB maturation.** The recruitment of hPOC5 to nascent centrioles  
472 occurs after initial assembly and coincides with building the centriole distal end, where hPOC5  
473 and centrin colocalize (Azimzadeh et al., 2009; Paoletti et al., 1996b). Consistent with this  
474 localization pattern, hPOC5 is essential for centriole elongation/maturation but is not required  
475 for the initiation of procentriole assembly. In this study, cortical row BB production is  
476 significantly heightened in *Tetrahymena* cells lacking both *POC5* genes, and cross-sections of  
477 the BB ultrastructure reveal intact proximal cartwheel structures, indicating that Poc5 is not  
478 critical for initiating BB assembly (Fig. 5C). In contrast to the BB proximal end, cortical row  
479 BBs docked at or near the cell surface display variable TZ formation at the distal end,  
480 illuminating an important role for Poc5 in *Tetrahymena* BB maturation and a shared function for  
481 Poc5 in building the distal end of both BBs and centrioles (Fig. 5D) (Azimzadeh et al., 2009).  
482 Further, a role for Poc5 in BB maturation provides a functional explanation for the dynamic  
483 removal of TtPoc5 from mature BBs, suggesting that TtPoc5 is removed after completed  
484 formation of the BB distal end. Notably, a previous study in *Chlamydomonas* found  
485 concentrated centrin at the BB distal end and centrin-depletion uncovered a similar  
486 requirement for centrin in BB maturation, indicating that centrin and Poc5 may cooperate in  
487 this important process (Koblentz et al., 2003). Interestingly, centrin-depleted *Chlamydomonas*  
488 cells with BB maturation defects also contained aberrant BB numbers, including BB  
489 overproduction, suggesting that delayed and/or impaired BB development is functionally  
490 connected with dysregulation of BB number. Thus, the overproduction of cortical row BBs in  
491 *Tetrahymena* cells lacking TtPoc5 and Sfr1 is likely a mechanism to compensate for delayed  
492 and/or defective BB maturation rather than a novel role for Poc5 in antagonizing BB  
493 production. The functional extent of this compensatory mechanism requires further  
494 investigation, especially how BB production is impacted in response to distinct changes in the  
495 rate of BB biogenesis. Lastly, cancer cells frequently lose precise control over centriole length,



496 and the recurrent feature of centriole size deregulation is associated with persistent centriole  
497 amplification (Marteil et al., 2018). Together, these findings may have uncovered a conserved  
498 cellular response that requires further examination, in which BBs and centrioles are  
499 overproduced when development of these structures, but not initial assembly, is compromised.

500

501 **Impact on ciliogenesis with loss of Poc5.** Whereas hPOC5-depletion leads to impaired  
502 centriole maturation and subsequently defective cell cycle progression, the combined loss of  
503 TtPoc5 and Sfr1 in *Tetrahymena* results in immature cortical row BBs that consequently do not  
504 template cilia at the cell surface (Fig. 5D) (Azimzadeh et al., 2009). Additionally, structural  
505 features found within the distal TZ and ciliary axoneme, such as a triplet-to-doublet MT  
506 transition and a central MT pair, are not evident in cross-sections of the BB ultrastructure (Fig.  
507 S4) (Meehl et al., 2016). Taken together, this delayed and/or failed ciliary assembly is not  
508 unexpected since a mature TZ serves to compartmentalize the cilium and is required for ciliary  
509 assembly and maintained ciliary function (Czarnecki and Shah, 2012). Similarly, flagella are  
510 frequently absent in centrin-depleted *Chlamydomonas* cells as a result of delayed BB  
511 development and improper BB maturation (Koblenz et al., 2003). Notably, this role for Poc5 in  
512 BB maturation may provide a functional explanation for ciliary defects associated with *hPOC5*  
513 mutations, including shorter cilia observed with overexpression of a *hPOC5* variant associated  
514 with adolescent idiopathic scoliosis (Hassan et al., 2019; Patten et al., 2015; Weisz Hubshman  
515 et al., 2018; Xu et al., 2018). Also, Poc5 and centrin colocalize in the connecting cilium of  
516 photoreceptors, which corresponds structurally to the TZ and is vital for retinal function (Weisz  
517 Hubshman et al., 2018; Wheway et al., 2014; Ying et al., 2019). Although the function of Poc5  
518 in the connecting cilium is not understood, a *hPOC5* mutation is associated with a form of  
519 retinal degeneration hallmarked by progressive loss of photoreceptors. Interestingly, a recent  
520 study of mouse centrins uncovered an important cooperative function between CETN2 and  
521 CETN3 in stabilizing the connecting cilium, suggesting that a role for Poc5 and centrins in BB  
522 maturation may translate to maturation of the analogous connecting cilium (Ying et al., 2019).

523 *Tetrahymena* cells are not viable when *TtPOC5* and *SFR1* are co-deleted, yet cells  
524 lacking either *POC5* gene persist indefinitely despite the presence of overproduced cortical  
525 row BBs. This suggests that the lethality observed in cells lacking both *POC5* genes is likely a  
526 direct consequence of delayed and/or failed ciliogenesis rather than an overproduction of BBs,

527 given that the hundreds of cilia on the surface of *Tetrahymena* cells have essential roles for  
528 survival, including locomotory and feeding functions (Bayless et al., 2015; Gaertig et al., 2013).  
529 Interestingly, a co-occurrence of overproduced BBs and a reduced ciliary density is apparent in  
530 viable cells lacking TtPoc5 alone; indicating that further examination is needed to understand  
531 whether the degree in which cilia numbers are reduced, potentially in combination with  
532 exacerbated BB overproduction, underlie cell death when *TtPoc5* and *SFR1* are absent.  
533 Lastly, loss of TtPoc5 and Sfr1 may result in mis-localization of *Tetrahymena* Cen1 and/or  
534 Cen2 at the BB distal end, where proper localization and function of Cen1 is essential for cell  
535 viability (Alexander J Stemm-Wolf et al., 2005; Vonderfecht et al., 2012). Thus, increasing our  
536 understanding of the role of centrin in this process may be critical for understanding the full  
537 extent of Poc5 BB function. In summary, *Tetrahymena* has two paralogous *POC5* genes that  
538 are required for BB maturation, highlighting a requirement for Poc5 in building the distal end of  
539 both BBs and centrioles. In the absence of Poc5, *Tetrahymena* cells elicit a compensatory  
540 response to defective BB maturation that leads to BB overproduction and a consequential  
541 increase in the typically constant BB number. These abundant, immature BBs lack an ability to  
542 nucleate a cilium, illuminating the importance of Poc5 in ciliary assembly and potentially  
543 revealing the functional implications of *hPOC5* mutations on ciliary function.

544

## 545 **MATERIALS AND METHODS**

### 546 ***Tetrahymena thermophila* strains and culture media**

547 A WT strain derived from the progeny of a cross between *B2086* and *CU428* was used as the  
548 control for assaying the growth rate of the *poc5Δ* strain and for phenotypic analysis of the  
549 *poc5Δ* and *poc5Δ rescue* strains. A WT strain derived from the progeny of a cross between  
550 *CU427* and *SB1969* was the control comparison for phenotypic analysis of the *poc5Δ; sfr1Δ*  
551 strain (all parental WT strains from the Tetrahymena Stock Center, Cornell University, Ithaca,  
552 NY, USA). Cells were grown either at room-temperature (RT), 30°C, or 37°C as indicated, in  
553 2% super-peptose (SPP) medium (Orias et al., 2000) to mid-log phase (~3x10<sup>5</sup> cells/ml). Cell  
554 density measurements were determined by a Z2 Coulter Counter (Beckman Coulter, Brea, CA,  
555 USA). For starvation (arresting cells in G1), cells were grown to mid-log phase in SPP  
556 medium, washed in 10 mM Tris-HCl (pH 7.4), and then resuspended in 10 mM Tris-HCl (pH  
557 7.4) for overnight incubation at 30°C. For starve and release experiments, cells were grown to

558 mid-log phase in SPP medium, washed and resuspended in 10 mM Tris-HCl (pH 7.4) for  
559 overnight incubation at 30°C, and then released back into SPP medium for five hours (to  
560 stimulate synchronous BB assembly). For experiments with the cadmium-inducible *MTT1*  
561 promoter (Shang et al., 2002), cells were incubated overnight at 30°C in SPP medium either  
562 containing no cadmium chloride (CdCl<sub>2</sub>) or 0.5µg/ml CdCl<sub>2</sub> at 30°C, as described.

563

### 564 **Identification of TtPoc5 and sequence comparison of Poc5 orthologs**

565 *Tetrahymena* Poc5 (TtPoc5; THERM\_00079160) was identified as the reciprocal best BLAST  
566 hit of full-length human POC5 (hPOC5)(Azimzadeh et al., 2009) in the *Tetrahymena* genome  
567 (Eisen et al., 2006). Of note, a prior evolutionary analysis of centriolar proteins used a  
568 previous alias of the same TtPoc5 ortholog, 5.m00513 (Hodges et al., 2010). The sequence  
569 alignment of hPOC5 and TtPoc5 was performed using ClustalW and the AA boxshading was  
570 performing using BoxShade, which are both available tools through the ExpASY Bioinformatics  
571 Resource Portal (<https://www.expasy.org/genomics>). Sequence logos were generated by  
572 WebLogo3 (Crooks et al., 2004; Schneider and Stephens, 1990) to visualize the AA  
573 composition of the conserved sequence motifs (canonical motif is Ax7LLx3F/Lx2WK/R) found  
574 within the three centrin-binding repeats (CBRs) of hPOC5 and TtPoc5 (Azimzadeh et al., 2009;  
575 Kilmartin, 2003). The 18 AA sequence motifs span positions 6-23, with five additional AAs  
576 upstream of the motifs (positions 1-5) included in the sequence logo. The size of the residue  
577 correlates with conservation and the color of the residue signifies the type of AA (hydrophobic  
578 is indicated in black, hydrophilic is blue, and neutral is green). The multiple sequence  
579 alignment of the highly conserved Poc5 box across select eukaryotes was performed using  
580 ClustalW and BoxShade. Select Poc5 orthologs as follows: human (NP\_001092741), mouse  
581 (NP\_080449), zebrafish (XP\_691080), *Chlamydomonas reinhardtii* (Protein Id:9798, v4.0  
582 through the Joint Genome Institute), and *Paramecium tetraurelia* (GSPATT00029936001,  
583 through *Paramecium* Genome Database).

584

### 585 **Plasmids and strain construction**

586 The endogenous C-terminal GFP fusion used to localize TtPoc5 was made in the pGFP-LAP-  
587 NEO2 plasmid (based on the p4T2-1 vector) (Gaertig et al., 1994), which provides integration  
588 into the endogenous *TtPOC5* locus and expression of Poc5-GFP under control of the

589 endogenous promoter. Briefly, 1kb of DNA from the 3' end of *TtPOC5* (immediately upstream  
590 of the stop codon) was cloned adjacent to the GFP-LAP tag, and 1kb of 3' sequence  
591 downstream of the stop codon was cloned into the vector flanking the NEO2 drug selection  
592 marker (conferring paromomycin resistance). A p4T21-MTT1pr-mCherry-Poc5 plasmid was  
593 created for TtPoc5 overexpression experiments, which provides integration into the  
594 endogenous *TtPOC5* locus and expression of the N-terminal mCherry-Poc5 fusion was under  
595 control of the cadmium-inducible *MTT1* promoter (Shang et al., 2002).

596 The *poc5Δ rescue* strain was generated by creating a *TtPOC5* rescue construct (pBS-  
597 *MTT1pr*-GFP-Poc5) that integrated into the *RPL29* locus and was under control of the  
598 cadmium-inducible *MTT1* promoter (Shang et al., 2002; Winey et al., 2012). This exogenous  
599 N-terminal GFP fusion was made by first cloning *TtPOC5* into the pENTR4 Dual Selection  
600 Entry Vector (Invitrogen, Carlsbad, CA, USA) and then using the Gateway cloning system  
601 (Invitrogen, Carlsbad, CA, USA), *TtPOC5* was subcloned into the pBS-*MTT1pr*-GFP-gtw  
602 vector (conferring cycloheximide resistance).

603 Sequence-confirmed constructs were linearized and transformed into the macronucleus  
604 of WT cells by biolistic bombardment using a PDS-1000 particle bombardier (Bio-Rad,  
605 Hercules, CA, USA) (Bruns and Cassidy-Hanley, 2000), except for pBS-MTT-GFP-POC5 (the  
606 *poc5Δ* rescue construct) which was transformed into the macronucleus of *poc5Δ* cells. For  
607 colocalization studies, cells expressing endogenous Poc5-GFP were transformed with  
608 endogenous Poc1-mCherry (Pearson et al., 2009), Sas6a-mCherry (Culver et al., 2009),  
609 and/or RSPH9-mCherry (gifted by Dr. Chad Pearson). In cells co-expressing Poc5-GFP,  
610 Poc1-mCherry, and RSPH9-mCherry, endogenous Poc1-mCherry was drug-selected with  
611 blasticidin while RSPH9-mCherry was drug-selected with cycloheximide (to allow for  
612 independent drug selection of each mCherry gene fusion).

613

#### 614 **Generation of the *poc5Δ* and *poc5Δ;sfr1Δ* strains**

615 The *poc5Δ* strain was generated by replacing the *TtPOC5* open reading frame with a high  
616 efficiency, codon-optimized *NEO2* (*coNEO2*) gene built for usage in *Tetrahymena* (Hai et al.,  
617 2000; Mochizuki, 2008). Targeted homologous recombination of the *TtPOC5* locus was  
618 achieved by using a knockout cassette with *coNEO2* flanked by 1kb of DNA upstream of the  
619 *TtPOC5* start codon and 1 kb of DNA downstream of the *TtPOC5* stop codon. For

620 micronuclear transformation, mating strains *B2086/CrNeo* and *CU428/CrNeo* were used,  
621 which both contain a *NEO* gene in their macronucleus with two frameshift mutations to prevent  
622 DNA elimination of the selectable marker (Mochizuki et al., 2002; Yao et al., 2003). During  
623 conjugation, the *TtPOC5* knockout construct was initially transformed into the germline  
624 micronucleus using biolistic bombardment of DNA-coated gold particles, as previously  
625 described (Bruns and Cassidy-Hanley, 2000; Hai et al., 2000). Following biolistic  
626 bombardment, cells were incubated overnight in 10 mM Tris-HCl (pH 7.4) to finish conjugation,  
627 and then introduced to SPP medium for paromomycin drug-selection of positive transformants.  
628 Two different mating types of micronuclear knockout heterokaryons were generated through  
629 star crosses, as previously described (Hai et al., 2000). Single mating pairs were isolated from  
630 a mating between the two micronuclear knockout heterokaryon strains, and progeny were  
631 confirmed by PCR and RT-PCR for complete loss of *TtPOC5* (*poc5Δ* cells). For PCR  
632 validation: WT *TtPOC5* forward: ATGAATTCAAATAAGAATCAACCAAAGAAGAAA, WT  
633 *TtPOC5* reverse: TTTTTTGGTAGTTGTTGTTTTTGTATTGC, *coNEO2* forward:  
634 ATTAATAACATTGCTGATGCTTTT and *coNEO2* reverse:  
635 GATTAATTACCTTCTAATAATTTGAAATAATTAATCC. For RT-PCR, RNA was isolated from  
636 WT and *poc5Δ* cells using the RNeasy Mini and QIAshredder kits (Qiagen, Hilden, Germany).  
637 cDNA was generated using the Superscript III One-Step RT-PCR system (Invitrogen,  
638 Carlsbad, CA, USA). Standard PCR followed: WT *TtPOC5* forward:  
639 ATGAATTCAAATAAGAATCAACCAAAGAAGAAA, WT *TtPOC5* reverse:  
640 TTTTTTGGTAGTTGTTGTTTTTGTATTGC, *coNEO2* forward:  
641 ATTAATAACATTGCTGATGCTTTT, and *coNEO2* reverse:  
642 GAAGACGATAGAAGGCGATACG.

643 For generation of the *poc5Δ; sfr1Δ* strain, micronuclear knockout heterokaryon strains of  
644 two different mating types were initially generated with germline micronuclei homozygous for  
645 both *coNEO2* in the *TtPOC5* locus and *NEO2* in the *SFR1* locus (Heydeck et al., 2016).  
646 Genotyping heterokaryons was performed by PCR since both cassettes conferred  
647 paromomycin drug resistance. PCR confirmation used: *coNEO2* forward:  
648 ATTAATAACATTGCTGATGCTTTT, *coNEO2* reverse:  
649 GATTAATTACCTTCTAATAATTTGAAATAATTAATCC, *NEO2* forward:  
650 AATCTACTAATTTGCTTTATTTTTTCATAAGC, and *NEO2* reverse:

651 TCCATACTTTGAAGATATCAAGC. An equal number of starved cells for each validated  
652 double heterokaryon strain were mixed together for mating overnight, and 24 hours after the  
653 initiation of mating an equal volume of 2x SPP medium was added. Cells were allowed to  
654 recover from mating in 2x SPP for four hours before adding paromomycin (200 µg/ml), this was  
655 considered the 0-hr timepoint for the *poc5Δ;sfr1Δ* double knockout (with basal body density  
656 measurements at 24 and 48 hours after paromomycin addition). In parallel to the double  
657 knockout mating, two control matings were performed as described with the double KO cells:  
658 WT x WT (*CU427* x *SB1969*) and WT x heterokaryons (to generate cells that are heterozygous  
659 for *TtPOC5* and *SFR1*).

660

### 661 **Fluorescence Imaging**

662 Images were collected using a Nikon Eclipse Ti inverted microscope (Nikon USA, Melville, NY,  
663 USA) with a CFI Plan Apo VC 60x H numerical aperture 1.4 objective and a charge-coupled  
664 device (CCD) CoolSNAP HQ2 camera (Teledyne Photometrics, Tuscon, AZ, USA).

665 Metamorph Imaging Software (Molecular Devices, San Jose, CA, USA) was used for image  
666 acquisition, with all images acquired at RT.

667 For live-cell imaging, cells were grown in 2% SPP medium, washed in 10 mM Tris-HCl  
668 (pH 7.4), pelleted, and placed on microscope slides (VWR, Radnor, PA, USA). For  
669 immunofluorescence, cells were fixed using 3% formaldehyde and fixed cells were placed on  
670 poly-L-lysine coated multi-well slides (Polysciences Inc., Warrington, PA, USA). Cells were  
671 then blocked for one hour using phosphate-buffered saline (PBS) + 1% bovine serum albumin  
672 (BSA) before overnight incubation at 4°C in primary antibody, followed by a two-hour RT  
673 incubation in secondary antibody. All primary and secondary antibodies were diluted in PBS +  
674 1% BSA. Primary antibodies used: α-TtCen1 (Alexander J. Stemm-Wolf et al., 2005) to label  
675 BBs and α-glutamylated tubulin (GT335 by AdipoGen, San Diego, CA, USA) to label ciliary  
676 axonemes (antibody also labels BBs) (Wolff et al., 1992). Secondary antibodies used: goat α-  
677 mouse or goat α-rabbit Alexa Fluor 488 (Invitrogen, Carlsbad, CA, USA). Cells were mounted  
678 in Citifluor mounting media (Ted Pella Inc., Redding, CA, USA).

679 In cells co-expressing Poc5-GFP and Poc1-mCherry, image averaging of GFP and  
680 mCherry signals was performed using ImageJ (National Institutes of Health, Bethesda, MD,  
681 USA) across 58 BB pairs. Images of Poc5-GFP and Poc1-mCherry BB signal were placed in a

682 stack and the sum fluorescence of the stack was measured to create an averaged  
683 fluorescence image. The BB scaffolds were approximated using 200 nm diameter dashed  
684 circles, based on the average diameter of a *Tetrahymena* BB and the positioning of the center  
685 of the Poc1-mCherry signal.

686

### 687 **Electron Microscopy**

688 Cells were prepared for electron tomography as described (Giddings et al., 2010; Meehl et al.,  
689 2009). Briefly, cells were gently spun into 15% dextran (molecular weight 9000–11,000;  
690 Sigma-Aldrich, St. Louis, MO, USA) with 5% BSA in 2% SPP medium. A small volume of the  
691 cell pellet was transferred to a sample holder and high-pressure frozen using a Wohlwend  
692 Compact 02 high pressure freezer (Technotrade International, Manchester, NH, USA). The  
693 frozen cells were freeze substituted in 0.25% glutaraldehyde and 0.1% uranyl acetate in  
694 acetone and then embedded in Lowicryl HM20 resin. Serial thick (250–300 nm) sections were  
695 cut using a Leica UCT ultramicrotome and section ribbons were collected on Formvar-coated  
696 copper slot grids. The grids were poststained with 2% aqueous uranyl acetate followed by  
697 Reynold's lead citrate. 15 nm gold beads (BBI Solutions, Crumlin, UK) were affixed to both  
698 sides of the grid to serve as markers for subsequent tilt series alignment. Serial thin (80 nm)  
699 sections were collected and imaged to evaluate overall basal body structure and cortical row  
700 organization. Dual-axis tilt series of *Tetrahymena* cells were collected on a Tecnai F30  
701 intermediate voltage electron microscope (Thermo Fisher Scientific, Waltham, MA, USA).  
702 Images were collected every one degree over a +/- 60 degree range using the SerialEM  
703 acquisition program (Mastronarde, 2005) with a Gatan Oneview camera at 1.2nm pixel. Serial  
704 section tomograms of *Tetrahymena* BBs were generated using the IMOD software package  
705 (Giddings et al., 2010; Kremer et al., 1996; Mastronarde, 1997). In total, five tomograms from  
706 the double KO and one serial tomogram from WT were reconstructed.

707

### 708 **Calculation of growth curves**

709 Growth curves for the *poc5Δ* strain were calculated from cells grown in 2% SPP medium at  
710 30°C and 37°C over the course of eight hours. Using a Z2 Coulter Counter (Beckman Coulter,  
711 Brea, CA, USA), cell density (cells/ml) measurements were taken at the 0-hour (with all  
712 cultures starting at  $0.5 \times 10^5$  cells/ml), 4-hour, and 8-hour timepoints. The final growth curves

713 for WT and *poc5Δ* cells were based on averaging cell density measurements from three  
714 independent experiments. The *WT* strain used to calculate growth curves (derived from the  
715 progeny of B2086xCU428) was the same *WT* strain used for phenotypic analysis of the *poc5Δ*  
716 strain.

717

### 718 **Quantification of cortical row BB and ciliary density**

719 The BB density (average BBs/10 μm) along cortical rows was quantified for WT and *poc5Δ*  
720 cells at RT, 30°C, and 37°C. BBs were labeled with the α-TtCen1 antibody and ImageJ  
721 (National Institutes of Health, Bethesda, MD, USA) was used to measure 10 μm regions along  
722 five separate cortical rows per cell (measurements on the side of the cell containing the oral  
723 apparatus and on the opposite side of the cell), across 20 cells in triplicate experiments. The  
724 final BB density was based on 300 total counts per condition. The same method was used to  
725 quantify the BB density for *poc5Δ* rescue and *poc5Δ;sfr1Δ* cells, but cells were only analyzed  
726 after growth in 2% SPP medium at 30°C. Quantification of the ciliary density (average cilia/10  
727 μm) was quantified for WT, *poc5Δ*, and *poc5Δ* rescue cells at 30°C. Ciliary axonemes (and  
728 BBs) were labeled with the α-glutamylated tubulin (GT335) antibody and ImageJ was used to  
729 measure 10 μm regions on both sides of the cell (similar to measuring the BB density), with the  
730 average ciliary density based on 100 total counts per strain.

731

### 732 **ACKNOWLEDGEMENTS**

733 We thank Chad Pearson for generously gifting the RSPH9-mCherry plasmid, Amy Fabritius for  
734 helpful discussions and reading of the manuscript, and Janet B. Meehl for her critical guidance  
735 of the electron microscopy work. Electron microscopy was performed at the Boulder Electron  
736 Microscopy Core Facility, University of Colorado, Boulder.

737

### 738 **COMPETING INTERESTS**

739 The authors declare no competing or financial interests.

740

### 741 **AUTHOR CONTRIBUTIONS**

742 W.H. executed all of the experiments with critical conceptualization from A.S.-W., except for  
743 the rescue and ciliary density experiments performed by B.A.B. and M.N., and the EM work



744 performed by E.O.T. and C.O. M.W. was involved in experimental design and preparation of  
745 the manuscript.

746

## 747 FUNDING

748 The work was supported by the National Institutes of Health, initially under NIH RO1  
749 GM074746 and completed under NIH RO1 GM127571 (both awarded to M.W.).

750

## 751 REFERENCES

- 752 Allen, R.D., 1969. The morphogenesis of basal bodies and accessory structures of the cortex  
753 of the ciliated protozoan *Tetrahymena pyriformis*. *J. Cell Biol.* 40, 716–733.
- 754 Azimzadeh, J., Hergert, P., Delouvée, A., Euteneuer, U., Formstecher, E., Khodjakov, A.,  
755 Bornens, M., 2009. hPOC5 is a centrin-binding protein required for assembly of full-  
756 length centrioles. *J. Cell Biol.* 185, 101–114. <https://doi.org/10.1083/jcb.200808082>
- 757 Badano, J.L., Mitsuma, N., Beales, P.L., Katsanis, N., 2006. The ciliopathies: an emerging  
758 class of human genetic disorders. *Annu. Rev. Genomics Hum. Genet.* 7, 125–148.  
759 <https://doi.org/10.1146/annurev.genom.7.080505.115610>
- 760 Baum, P., Furlong, C., Byers, B., 1986. Yeast gene required for spindle pole body duplication:  
761 homology of its product with Ca<sup>2+</sup>-binding proteins. *Proc. Natl. Acad. Sci. U. S. A.* 83,  
762 5512–5516. <https://doi.org/10.1073/pnas.83.15.5512>
- 763 Bayless, B.A., Galati, D.F., Junker, A.D., Backer, C.B., Gaertig, J., Pearson, C.G., 2016.  
764 Asymmetrically localized proteins stabilize basal bodies against ciliary beating forces. *J*  
765 *Cell Biol* 215, 457–466. <https://doi.org/10.1083/jcb.201604135>
- 766 Bayless, B.A., Galati, D.F., Pearson, C.G., 2015. *Tetrahymena* basal bodies. *Cilia* 5, 1.  
767 <https://doi.org/10.1186/s13630-016-0022-8>
- 768 Bayless, B.A., Giddings, T.H., Jr, Winey, M., Pearson, C.G., 2012. Bld10/Cep135 stabilizes  
769 basal bodies to resist cilia-generated forces. *Mol. Biol. Cell* 23, 4820–4832.  
770 <https://doi.org/10.1091/mbc.E12-08-0577>
- 771 Brooks, E.R., Wallingford, J.B., 2014. Multiciliated cells: a review. *Curr. Biol.* CB 24, R973–  
772 R982. <https://doi.org/10.1016/j.cub.2014.08.047>
- 773 Bruns, P.J., Cassidy-Hanley, D., 2000. Biolistic transformation of macro- and micronuclei.  
774 *Methods Cell Biol.* 62, 501–512.
- 775 Carvalho-Santos, Z., Azimzadeh, J., Pereira-Leal, J.B., Bettencourt-Dias, M., 2011. Evolution:  
776 Tracing the origins of centrioles, cilia, and flagella. *J. Cell Biol.* 194, 165–175.  
777 <https://doi.org/10.1083/jcb.201011152>
- 778 Cassidy-Hanley, D.M., 2012. *Tetrahymena* in the Laboratory: Strain Resources, Methods for  
779 Culture, Maintenance, and Storage. *Methods Cell Biol.* 109, 237–276.  
780 <https://doi.org/10.1016/B978-0-12-385967-9.00008-6>
- 781 Chan, J.Y., 2011. A clinical overview of centrosome amplification in human cancers. *Int. J.*  
782 *Biol. Sci.* 7, 1122–1144.
- 783 Chang, C.-W., Hsu, W.-B., Tsai, J.-J., Tang, C.-J.C., Tang, T.K., 2016. CEP295 interacts with  
784 microtubules and is required for centriole elongation. *J. Cell Sci.* 129, 2501–2513.  
785 <https://doi.org/10.1242/jcs.186338>

- 786 Chen, H.-Y., Wu, C.-T., Tang, C.-J.C., Lin, Y.-N., Wang, W.-J., Tang, T.K., 2017. Human  
787 microcephaly protein RTTN interacts with STIL and is required to build full-length  
788 centrioles. *Nat. Commun.* 8, 247. <https://doi.org/10.1038/s41467-017-00305-0>
- 789 Comartin, D., Gupta, G.D., Fussner, E., Coyaud, É., Hasegan, M., Archinti, M., Cheung,  
790 S.W.T., Pinchev, D., Lawo, S., Raught, B., Bazett-Jones, D.P., Lüders, J., Pelletier, L.,  
791 2013. CEP120 and SPICE1 Cooperate with CPAP in Centriole Elongation. *Curr. Biol.*  
792 23, 1360–1366. <https://doi.org/10.1016/j.cub.2013.06.002>
- 793 Crooks, G.E., Hon, G., Chandonia, J.-M., Brenner, S.E., 2004. WebLogo: a sequence logo  
794 generator. *Genome Res.* 14, 1188–1190. <https://doi.org/10.1101/gr.849004>
- 795 Culver, B.P., Meehl, J.B., Giddings, T.H., Winey, M., 2009. The two SAS-6 homologs in  
796 *Tetrahymena thermophila* have distinct functions in basal body assembly. *Mol. Biol. Cell*  
797 20, 1865–1877. <https://doi.org/10.1091/mbc.E08-08-0838>
- 798 Czarnecki, P.G., Shah, J.V., 2012. The ciliary transition zone: from morphology and molecules  
799 to medicine. *Trends Cell Biol.* 22, 201–210. <https://doi.org/10.1016/j.tcb.2012.02.001>
- 800 Dantas, T.J., Daly, O.M., Conroy, P.C., Tomas, M., Wang, Y., Lalor, P., Dockery, P., Ferrando-  
801 May, E., Morrison, C.G., 2013. Calcium-binding capacity of centrin2 is required for linear  
802 POC5 assembly but not for nucleotide excision repair. *PloS One* 8, e68487.  
803 <https://doi.org/10.1371/journal.pone.0068487>
- 804 Dantas, T.J., Wang, Y., Lalor, P., Dockery, P., Morrison, C.G., 2011. Defective nucleotide  
805 excision repair with normal centrosome structures and functions in the absence of all  
806 vertebrate centrin. *J. Cell Biol.* 193, 307–318. <https://doi.org/10.1083/jcb.201012093>
- 807 Dawe, H.R., Farr, H., Gull, K., 2007. Centriole/basal body morphogenesis and migration during  
808 ciliogenesis in animal cells. *J. Cell Sci.* 120, 7–15. <https://doi.org/10.1242/jcs.03305>
- 809 Delaval, B., Covassin, L., Lawson, N.D., Doxsey, S., 2011. Centrin depletion causes cyst  
810 formation and other ciliopathy-related phenotypes in zebrafish. *Cell Cycle Georget. Tex*  
811 10, 3964–3972. <https://doi.org/10.4161/cc.10.22.18150>
- 812 Eisen, J.A., Coyne, R.S., Wu, M., Wu, D., Thiagarajan, M., Wortman, J.R., Badger, J.H., Ren,  
813 Q., Amedeo, P., Jones, K.M., Tallon, L.J., Delcher, A.L., Salzberg, S.L., Silva, J.C.,  
814 Haas, B.J., Majoros, W.H., Farzad, M., Carlton, J.M., Smith, R.K., Garg, J., Pearlman,  
815 R.E., Karrer, K.M., Sun, L., Manning, G., Elde, N.C., Turkewitz, A.P., Asai, D.J., Wilkes,  
816 D.E., Wang, Y., Cai, H., Collins, K., Stewart, B.A., Lee, S.R., Wilamowska, K.,  
817 Weinberg, Z., Ruzzo, W.L., Wloga, D., Gaertig, J., Frankel, J., Tsao, C.-C., Gorovsky,  
818 M.A., Keeling, P.J., Waller, R.F., Patron, N.J., Cherry, J.M., Stover, N.A., Krieger, C.J.,  
819 del Toro, C., Ryder, H.F., Williamson, S.C., Barbeau, R.A., Hamilton, E.P., Orias, E.,  
820 2006. Macronuclear genome sequence of the ciliate *Tetrahymena thermophila*, a model  
821 eukaryote. *PLoS Biol.* 4, e286. <https://doi.org/10.1371/journal.pbio.0040286>
- 822 Firat-Karalar, E.N., Rauniyar, N., Yates, J.R. 3rd, Stearns, T., 2014. Proximity interactions  
823 among centrosome components identify regulators of centriole duplication. *Curr. Biol.*  
824 CB 24, 664–670. <https://doi.org/10.1016/j.cub.2014.01.067>
- 825 Firat-Karalar, E.N., Stearns, T., 2014. The centriole duplication cycle. *Philos. Trans. R. Soc.*  
826 Lond. B. Biol. Sci. 369. <https://doi.org/10.1098/rstb.2013.0460>
- 827 Frankel, J., 2008. What do genic mutations tell us about the structural patterning of a complex  
828 single-celled organism? *Eukaryot. Cell* 7, 1617–1639. [https://doi.org/10.1128/EC.00161-](https://doi.org/10.1128/EC.00161-08)  
829 08
- 830 Frankel, J., 1980. Propagation of cortical differences in tetrahymena. *Genetics* 94, 607–623.

- 831 Gaertig, J., Gu, L., Hai, B., Gorovsky, M.A., 1994. High frequency vector-mediated  
832 transformation and gene replacement in *Tetrahymena*. *Nucleic Acids Res.* 22, 5391–  
833 5398.
- 834 Gaertig, J., Wloga, D., Vasudevan, K.K., Guha, M., Dentler, W., 2013. Discovery and  
835 functional evaluation of ciliary proteins in *Tetrahymena thermophila*. *Methods Enzymol.*  
836 525, 265–284. <https://doi.org/10.1016/B978-0-12-397944-5.00013-4>
- 837 Galati, D.F., Abuin, D.S., Tauber, G.A., Pham, A.T., Pearson, C.G., 2015. Automated image  
838 analysis reveals the dynamic 3-dimensional organization of multi-ciliary arrays. *Biol.*  
839 *Open.* <https://doi.org/10.1242/bio.014951>
- 840 Garcia-Gonzalo, F.R., Reiter, J.F., 2017. Open Sesame: How Transition Fibers and the  
841 Transition Zone Control Ciliary Composition. *Cold Spring Harb. Perspect. Biol.* 9,  
842 a028134. <https://doi.org/10.1101/cshperspect.a028134>
- 843 Giddings, T.H., Jr, Meehl, J.B., Pearson, C.G., Winey, M., 2010. Electron tomography and  
844 immuno-labeling of *Tetrahymena thermophila* basal bodies. *Methods Cell Biol.* 96, 117–  
845 141. [https://doi.org/10.1016/S0091-679X\(10\)96006-8](https://doi.org/10.1016/S0091-679X(10)96006-8)
- 846 Gogondeau, D., Beisson, J., de Loubresse, N.G., Le Caer, J.-P., Ruiz, F., Cohen, J., Sperling,  
847 L., Koll, F., Klotz, C., 2007. An Sfi1p-like centriin-binding protein mediates centriin-based  
848 Ca<sup>2+</sup> -dependent contractility in *Paramecium tetraurelia*. *Eukaryot. Cell* 6, 1992–2000.  
849 <https://doi.org/10.1128/EC.00197-07>
- 850 Gonçalves, J., Pelletier, L., 2017. The Ciliary Transition Zone: Finding the Pieces and  
851 Assembling the Gate. *Mol. Cells* 40, 243–253.  
852 <https://doi.org/10.14348/molcells.2017.0054>
- 853 Gönczy, P., 2012. Towards a molecular architecture of centriole assembly. *Nat. Rev. Mol. Cell*  
854 *Biol.* 13, 425–435. <https://doi.org/10.1038/nrm3373>
- 855 Guichard, P., Hamel, V., Gönczy, P., 2018. The Rise of the Cartwheel: Seeding the Centriole  
856 Organelle. *BioEssays* 40, 1700241. <https://doi.org/10.1002/bies.201700241>
- 857 Hai, B., Gaertig, J., Gorovsky, M.A., 2000. Knockout heterokaryons enable facile mutagenic  
858 analysis of essential genes in *Tetrahymena*. *Methods Cell Biol.* 62, 513–531.
- 859 Hassan, A., Parent, S., Mathieu, H., Zaouter, C., Molidperee, S., Bagu, E.T., Barchi, S.,  
860 Villemure, I., Patten, S.A., Moldovan, F., 2019. Adolescent idiopathic scoliosis  
861 associated POC5 mutation impairs cell cycle, cilia length and centrosome protein  
862 interactions. *PloS One* 14, e0213269. <https://doi.org/10.1371/journal.pone.0213269>
- 863 Heydeck, W., Stemm-Wolf, A.J., Knop, J., Poh, C.C., Winey, M., 2016. Sfr1, a *Tetrahymena*  
864 *thermophila* Sfi1 Repeat Protein, Modulates the Production of Cortical Row Basal  
865 Bodies. *mSphere* 1. <https://doi.org/10.1128/mSphere.00257-16>
- 866 Hirono, M., 2014. Cartwheel assembly. *Philos. Trans. R. Soc. B Biol. Sci.* 369.  
867 <https://doi.org/10.1098/rstb.2013.0458>
- 868 Hodges, M.E., Scheumann, N., Wickstead, B., Langdale, J.A., Gull, K., 2010. Reconstructing  
869 the evolutionary history of the centriole from protein components. *J. Cell Sci.* 123,  
870 1407–1413. <https://doi.org/10.1242/jcs.064873>
- 871 Ishikawa, H., Marshall, W.F., 2011. Ciliogenesis: building the cell's antenna. *Nat. Rev. Mol.*  
872 *Cell Biol.* 12, 222–234. <https://doi.org/10.1038/nrm3085>
- 873 Keller, L.C., Geimer, S., Romijn, E., Yates, J., 3rd, Zamora, I., Marshall, W.F., 2009. Molecular  
874 architecture of the centriole proteome: the conserved WD40 domain protein POC1 is  
875 required for centriole duplication and length control. *Mol. Biol. Cell* 20, 1150–1166.  
876 <https://doi.org/10.1091/mbc.E08-06-0619>

- 877 Kilburn, C.L., Pearson, C.G., Romijn, E.P., Meehl, J.B., Giddings, T.H., Jr, Culver, B.P., Yates,  
878 J.R., 3rd, Winey, M., 2007. New Tetrahymena basal body protein components identify  
879 basal body domain structure. *J. Cell Biol.* 178, 905–912.  
880 <https://doi.org/10.1083/jcb.200703109>
- 881 Kilmartin, J.V., 2003. Sfi1p has conserved centrin-binding sites and an essential function in  
882 budding yeast spindle pole body duplication. *J. Cell Biol.* 162, 1211–1221.  
883 <https://doi.org/10.1083/jcb.200307064>
- 884 Kobayashi, T., Dynlacht, B.D., 2011. Regulating the transition from centriole to basal body. *J.*  
885 *Cell Biol.* 193, 435–444. <https://doi.org/10.1083/jcb.201101005>
- 886 Koblenz, B., Schoppmeier, J., Grunow, A., Lechtreck, K.-F., 2003. Centrin deficiency in  
887 *Chlamydomonas* causes defects in basal body replication, segregation and maturation.  
888 *J. Cell Sci.* 116, 2635–2646. <https://doi.org/10.1242/jcs.00497>
- 889 Kodani, A., Moyer, T., Chen, A., Holland, A., Walsh, C.A., Reiter, J.F., 2019. SFI1 promotes  
890 centriole duplication by recruiting USP9X to stabilize the microcephaly protein STIL. *J.*  
891 *Cell Biol.* 218, 2185–2197. <https://doi.org/10.1083/jcb.201803041>
- 892 Kremer, J.R., Mastronarde, D.N., McIntosh, J.R., 1996. Computer visualization of three-  
893 dimensional image data using IMOD. *J. Struct. Biol.* 116, 71–76.  
894 <https://doi.org/10.1006/jsbi.1996.0013>
- 895 Laoukili, J., Perret, E., Middendorp, S., Houcine, O., Guennou, C., Marano, F., Bornens, M.,  
896 Tournier, F., 2000. Differential expression and cellular distribution of centrin isoforms  
897 during human ciliated cell differentiation in vitro. *J. Cell Sci.* 113, 1355–1364.
- 898 Li, S., Sandercock, A.M., Conduit, P., Robinson, C.V., Williams, R.L., Kilmartin, J.V., 2006.  
899 Structural role of Sfi1p-centrin filaments in budding yeast spindle pole body duplication.  
900 *J. Cell Biol.* 173, 867–877. <https://doi.org/10.1083/jcb.200603153>
- 901 Marteil, G., Guerrero, A., Vieira, A.F., Almeida, B.P. de, Machado, P., Mendonça, S., Mesquita,  
902 M., Villarreal, B., Fonseca, I., Francia, M.E., Dores, K., Martins, N.P., Jana, S.C.,  
903 Tranfield, E.M., Barbosa-Morais, N.L., Paredes, J., Pellman, D., Godinho, S.A.,  
904 Bettencourt-Dias, M., 2018. Over-elongation of centrioles in cancer promotes centriole  
905 amplification and chromosome missegregation. *Nat. Commun.* 9, 1258.  
906 <https://doi.org/10.1038/s41467-018-03641-x>
- 907 Martinez-Sanz, J., Kateb, F., Assairi, L., Blouquit, Y., Bodenhausen, G., Abergel, D.,  
908 Mouawad, L., Craescu, C.T., 2010. Structure, dynamics and thermodynamics of the  
909 human centrin 2/hSfi1 complex. *J. Mol. Biol.* 395, 191–204.  
910 <https://doi.org/10.1016/j.jmb.2009.10.041>
- 911 Martinez-Sanz, J., Yang, A., Blouquit, Y., Duchambon, P., Assairi, L., Craescu, C.T., 2006.  
912 Binding of human centrin 2 to the centrosomal protein hSfi1. *FEBS J.* 273, 4504–4515.  
913 <https://doi.org/10.1111/j.1742-4658.2006.05456.x>
- 914 Mastronarde, D.N., 2005. Automated electron microscope tomography using robust prediction  
915 of specimen movements. *J. Struct. Biol.* 152, 36–51.  
916 <https://doi.org/10.1016/j.jsb.2005.07.007>
- 917 Mastronarde, D.N., 1997. Dual-axis tomography: an approach with alignment methods that  
918 preserve resolution. *J. Struct. Biol.* 120, 343–352. <https://doi.org/10.1006/jsbi.1997.3919>
- 919 Meehl, J.B., Bayless, B.A., Giddings, T.H., Pearson, C.G., Winey, M., 2016. Tetrahymena  
920 Poc1 ensures proper intertriplet microtubule linkages to maintain basal body integrity.  
921 *Mol. Biol. Cell* 27, 2394–2403. <https://doi.org/10.1091/mbc.E16-03-0165>

- 922 Meehl, J.B., Giddings, T.H., Winey, M., 2009. High pressure freezing, electron microscopy,  
923 and immuno-electron microscopy of *Tetrahymena thermophila* basal bodies. *Methods*  
924 *Mol. Biol.* Clifton NJ 586, 227–241. [https://doi.org/10.1007/978-1-60761-376-3\\_12](https://doi.org/10.1007/978-1-60761-376-3_12)
- 925 Mochizuki, K., 2008. High efficiency transformation of *Tetrahymena* using a codon-optimized  
926 neomycin resistance gene. *Gene* 425, 79–83.  
927 <https://doi.org/10.1016/j.gene.2008.08.007>
- 928 Mochizuki, K., Fine, N.A., Fujisawa, T., Gorovsky, M.A., 2002. Analysis of a piwi-related gene  
929 implicates small RNAs in genome rearrangement in *tetrahymena*. *Cell* 110, 689–699.
- 930 Nachury, M.V., Mick, D.U., 2019. Establishing and regulating the composition of cilia for signal  
931 transduction. *Nat. Rev. Mol. Cell Biol.* 20, 389. [https://doi.org/10.1038/s41580-019-](https://doi.org/10.1038/s41580-019-0116-4)  
932 [0116-4](https://doi.org/10.1038/s41580-019-0116-4)
- 933 Nanney, D.L., 1975. Patterns of basal body addition in ciliary rows in *Tetrahymena*. *J. Cell Biol.*  
934 65, 503–512.
- 935 Nanney, D.L., 1971. The pattern of replication of cortical units in *Tetrahymena*. *Dev. Biol.* 26,  
936 296–305.
- 937 Nanney, D.L., 1968. Cortical patterns in cellular morphogenesis. Differences in cortical  
938 patterns in ciliates may be hereditary, but independent of genic differences. *Science*  
939 160, 496–502.
- 940 Nanney, D.L., 1966. Corticotype transmission in *Tetrahymena*. *Genetics* 54, 955–968.
- 941 Nishi, R., Okuda, Y., Watanabe, E., Mori, T., Iwai, S., Masutani, C., Sugasawa, K., Hanaoka,  
942 F., 2005. Centrin 2 stimulates nucleotide excision repair by interacting with xeroderma  
943 pigmentosum group C protein. *Mol. Cell. Biol.* 25, 5664–5674.  
944 <https://doi.org/10.1128/MCB.25.13.5664-5674.2005>
- 945 Nonaka, S., Tanaka, Y., Okada, Y., Takeda, S., Harada, A., Kanai, Y., Kido, M., Hirokawa, N.,  
946 1998. Randomization of left-right asymmetry due to loss of nodal cilia generating  
947 leftward flow of extraembryonic fluid in mice lacking KIF3B motor protein. *Cell* 95, 829–  
948 837. [https://doi.org/10.1016/s0092-8674\(00\)81705-5](https://doi.org/10.1016/s0092-8674(00)81705-5)
- 949 Olliazadeh, N., Gorman, K.F., Eveleigh, R., Bourque, G., Moreau, A., 2017. Identification of  
950 Elongated Primary Cilia with Impaired Mechanotransduction in Idiopathic Scoliosis  
951 Patients. *Sci. Rep.* 7, 44260. <https://doi.org/10.1038/srep44260>
- 952 Orias, E., Hamilton, E.P., Orias, J.D., 2000. *Tetrahymena* as a laboratory organism: useful  
953 strains, cell culture, and cell line maintenance. *Methods Cell Biol.* 62, 189–211.
- 954 Paoletti, A., Moudjou, M., Paintrand, M., Salisbury, J.L., Bornens, M., 1996a. Most of centrin in  
955 animal cells is not centrosome-associated and centrosomal centrin is confined to the  
956 distal lumen of centrioles. *J. Cell Sci.* 109, 3089–3102.
- 957 Paoletti, A., Moudjou, M., Paintrand, M., Salisbury, J.L., Bornens, M., 1996b. Most of centrin in  
958 animal cells is not centrosome-associated and centrosomal centrin is confined to the  
959 distal lumen of centrioles. *J. Cell Sci.* 109 ( Pt 13), 3089–3102.
- 960 Patten, S.A., Margaritte-Jeannin, P., Bernard, J.-C., Alix, E., Labalme, A., Besson, A., Girard,  
961 S.L., Fendri, K., Fraise, N., Biot, B., Poizat, C., Campan-Fournier, A., Abelin-Genevois,  
962 K., Cunin, V., Zaouter, C., Liao, M., Lamy, R., Lesca, G., Menassa, R., Marcaillou, C.,  
963 Letexier, M., Sanlaville, D., Berard, J., Rouleau, G.A., Clerget-Darpoux, F., Drapeau, P.,  
964 Moldovan, F., Edery, P., 2015. Functional variants of POC5 identified in patients with  
965 idiopathic scoliosis. *J. Clin. Invest.* 125, 1124–1128. <https://doi.org/10.1172/JCI77262>
- 966 Pearson, C.G., 2014. Choosing sides – asymmetric centriole and basal body assembly. *J. Cell*  
967 *Sci.* 127, 2803–2810. <https://doi.org/10.1242/jcs.151761>

- 968 Pearson, C.G., Osborn, D.P.S., Giddings, T.H., Jr, Beales, P.L., Winey, M., 2009. Basal body  
969 stability and ciliogenesis requires the conserved component Poc1. *J. Cell Biol.* 187,  
970 905–920. <https://doi.org/10.1083/jcb.200908019>
- 971 Pearson, C.G., Winey, M., 2009. Basal body assembly in ciliates: the power of numbers.  
972 *Traffic Cph. Den.* 10, 461–471. <https://doi.org/10.1111/j.1600-0854.2009.00885.x>
- 973 Reiter, J.F., Leroux, M.R., 2017. Genes and molecular pathways underpinning ciliopathies.  
974 *Nat. Rev. Mol. Cell Biol.* 18, 533–547. <https://doi.org/10.1038/nrm.2017.60>
- 975 Rodrigues-Martins, A., Riparbelli, M., Callaini, G., Glover, D.M., Bettencourt-Dias, M., 2008.  
976 From centriole biogenesis to cellular function: centrioles are essential for cell division at  
977 critical developmental stages. *Cell Cycle Georget. Tex* 7, 11–16.  
978 <https://doi.org/10.4161/cc.7.1.5226>
- 979 Ruiz, F., Garreau de Loubresse, N., Klotz, C., Beisson, J., Koll, F., 2005. Centrin deficiency in  
980 *Paramecium* affects the geometry of basal-body duplication. *Curr. Biol. CB* 15, 2097–  
981 2106. <https://doi.org/10.1016/j.cub.2005.11.038>
- 982 Sattler, C.A., Staehelin, L.A., 1974. Ciliary membrane differentiations in *Tetrahymena*  
983 pyriformis. *Tetrahymena* has four types of cilia. *J. Cell Biol.* 62, 473–490.
- 984 Sawant, D.B., Majumder, S., Perkins, J.L., Yang, C.-H., Eyers, P.A., Fisk, H.A., 2015. Centrin  
985 3 is an inhibitor of centrosomal Mps1 and antagonizes centrin 2 function. *Mol. Biol. Cell*  
986 26, 3741–3753. <https://doi.org/10.1091/mbc.E14-07-1248>
- 987 Schmidt, T.I., Kleylein-Sohn, J., Westendorf, J., Le Clech, M., Lavoie, S.B., Stierhof, Y.-D.,  
988 Nigg, E.A., 2009. Control of centriole length by CPAP and CP110. *Curr. Biol. CB* 19,  
989 1005–1011. <https://doi.org/10.1016/j.cub.2009.05.016>
- 990 Schneider, T.D., Stephens, R.M., 1990. Sequence logos: a new way to display consensus  
991 sequences. *Nucleic Acids Res.* 18, 6097–6100. <https://doi.org/10.1093/nar/18.20.6097>
- 992 Shang, Y., Song, X., Bowen, J., Corstanje, R., Gao, Y., Gaertig, J., Gorovsky, M.A., 2002. A  
993 robust inducible-repressible promoter greatly facilitates gene knockouts, conditional  
994 expression, and overexpression of homologous and heterologous genes in  
995 *Tetrahymena thermophila*. *Proc. Natl. Acad. Sci. U. S. A.* 99, 3734–3739.  
996 <https://doi.org/10.1073/pnas.052016199>
- 997 Shi, J., Zhao, Y., Vonderfecht, T., Winey, M., Klymkowsky, M.W., 2015. Centrin-2 (Cetn2)  
998 mediated regulation of FGF/FGFR gene expression in *Xenopus*. *Sci. Rep.* 5, 10283.  
999 <https://doi.org/10.1038/srep10283>
- 1000 Stemm-Wolf, A.J., Meehl, J.B., Winey, M., 2013. Sfr13, a member of a large family of  
1001 asymmetrically localized Sfi1-repeat proteins, is important for basal body separation and  
1002 stability in *Tetrahymena thermophila*. *J. Cell Sci.* 126, 1659–1671.  
1003 <https://doi.org/10.1242/jcs.120238>
- 1004 Stemm-Wolf, Alexander J, Morgan, G., Giddings, T.H., Jr, White, E.A., Marchione, R.,  
1005 McDonald, H.B., Winey, M., 2005. Basal body duplication and maintenance require one  
1006 member of the *Tetrahymena thermophila* centrin gene family. *Mol. Biol. Cell* 16, 3606–  
1007 3619. <https://doi.org/10.1091/mbc.E04-10-0919>
- 1008 Stemm-Wolf, Alexander J., Morgan, G., Giddings, T.H., White, E.A., Marchione, R., McDonald,  
1009 H.B., Winey, M., 2005. Basal body duplication and maintenance require one member of  
1010 the *Tetrahymena thermophila* centrin gene family. *Mol. Biol. Cell* 16, 3606–3619.  
1011 <https://doi.org/10.1091/mbc.E04-10-0919>
- 1012 Strnad, P., Gönczy, P., 2008. Mechanisms of procentriole formation. *Trends Cell Biol.* 18, 389–  
1013 396. <https://doi.org/10.1016/j.tcb.2008.06.004>

- 1014 Tanos, B.E., Yang, H.-J., Soni, R., Wang, W.-J., Macaluso, F.P., Asara, J.M., Tsou, M.-F.B.,  
1015 2013. Centriole distal appendages promote membrane docking, leading to cilia  
1016 initiation. *Genes Dev.* 27, 163–168. <https://doi.org/10.1101/gad.207043.112>
- 1017 Vldar, E.K., Stearns, T., 2007. Molecular characterization of centriole assembly in ciliated  
1018 epithelial cells. *J. Cell Biol.* 178, 31–42. <https://doi.org/10.1083/jcb.200703064>
- 1019 Vonderfecht, T., Cookson, M.W., Giddings, T.H., Clarissa, C., Winey, M., 2012. The two  
1020 human centrin homologues have similar but distinct functions at *Tetrahymena* basal  
1021 bodies. *Mol. Biol. Cell* 23, 4766–4777. <https://doi.org/10.1091/mbc.E12-06-0454>
- 1022 Vonderfecht, T., Stemm-Wolf, A.J., Hendershott, M., Giddings, T.H., Jr, Meehl, J.B., Winey,  
1023 M., 2011. The two domains of centrin have distinct basal body functions in  
1024 *Tetrahymena*. *Mol. Biol. Cell* 22, 2221–2234. <https://doi.org/10.1091/mbc.E11-02-0151>
- 1025 Waters, A.M., Beales, P.L., 2011. Ciliopathies: an expanding disease spectrum. *Pediatr.*  
1026 *Nephrol. Berl. Ger.* 26, 1039–1056. <https://doi.org/10.1007/s00467-010-1731-7>
- 1027 Weisz Hubshman, M., Broekman, S., van Wijk, E., Cremers, F., Abu-Diab, A., Khateb, S.,  
1028 Tzur, S., Lagovsky, I., Smirin-Yosef, P., Sharon, D., Haer-Wigman, L., Banin, E., Basel-  
1029 Vanagaite, L., de Vrieze, E., 2018. Whole-exome sequencing reveals POC5 as a novel  
1030 gene associated with autosomal recessive retinitis pigmentosa. *Hum. Mol. Genet.* 27,  
1031 614–624. <https://doi.org/10.1093/hmg/ddx428>
- 1032 Wheway, G., Parry, D.A., Johnson, C.A., 2014. The role of primary cilia in the development  
1033 and disease of the retina. *Organogenesis* 10, 69–85. <https://doi.org/10.4161/org.26710>
- 1034 Winey, M., Stemm-Wolf, A.J., Giddings, T.H., Pearson, C.G., 2012. Cytological analysis of  
1035 *Tetrahymena thermophila*. *Methods Cell Biol.* 109, 357–378.  
1036 <https://doi.org/10.1016/B978-0-12-385967-9.00013-X>
- 1037 Wolff, A., de Néchaud, B., Chillet, D., Mazarguil, H., Desbruyères, E., Audebert, S., Eddé, B.,  
1038 Gros, F., Denoulet, P., 1992. Distribution of glutamylated alpha and beta-tubulin in  
1039 mouse tissues using a specific monoclonal antibody, GT335. *Eur. J. Cell Biol.* 59, 425–  
1040 432.
- 1041 Wong, Y.L., Anzola, J.V., Davis, R.L., Yoon, M., Motamedi, A., Kroll, A., Seo, C.P., Hsia, J.E.,  
1042 Kim, S.K., Mitchell, J.W., Mitchell, B.J., Desai, A., Gahman, T.C., Shiau, A.K., Oegema,  
1043 K., 2015. Cell biology. Reversible centriole depletion with an inhibitor of Polo-like kinase  
1044 4. *Science* 348, 1155–1160. <https://doi.org/10.1126/science.aaa5111>
- 1045 Xu, L., Sheng, F., Xia, C., Li, Y., Feng, Z., Qiu, Y., Zhu, Z., 2018. Common Variant of POC5 Is  
1046 Associated With the Susceptibility of Adolescent Idiopathic Scoliosis. *Spine* 43, E683–  
1047 E688. <https://doi.org/10.1097/BRS.0000000000002490>
- 1048 Yan, X., Zhao, H., Zhu, X., 2016. Production of Basal Bodies in bulk for dense multicilia  
1049 formation. *F1000Research* 5. <https://doi.org/10.12688/f1000research.8469.1>
- 1050 Yang, P., Diener, D.R., Yang, C., Kohno, T., Pazour, G.J., Dienes, J.M., Agrin, N.S., King,  
1051 S.M., Sale, W.S., Kamiya, R., Rosenbaum, J.L., Witman, G.B., 2006. Radial spoke  
1052 proteins of *Chlamydomonas flagella*. *J. Cell Sci.* 119, 1165–1174.  
1053 <https://doi.org/10.1242/jcs.02811>
- 1054 Yao, M.-C., Fuller, P., Xi, X., 2003. Programmed DNA deletion as an RNA-guided system of  
1055 genome defense. *Science* 300, 1581–1584. <https://doi.org/10.1126/science.1084737>
- 1056 Ying, G., Avasthi, P., Irwin, M., Gerstner, C.D., Frederick, J.M., Lucero, M.T., Baehr, W., 2014.  
1057 Centrin 2 is required for mouse olfactory ciliary trafficking and development of  
1058 ependymal cilia planar polarity. *J. Neurosci. Off. J. Soc. Neurosci.* 34, 6377–6388.  
1059 <https://doi.org/10.1523/JNEUROSCI.0067-14.2014>

1060 Ying, G., Frederick, J.M., Baehr, W., 2019. Deletion of both centrin 2 (CETN2) and CETN3  
1061 destabilizes the distal connecting cilium of mouse photoreceptors. J. Biol. Chem.  
1062 <https://doi.org/10.1074/jbc.RA118.006371>  
1063

## 1064 **FIGURE LEGENDS**

1065 **Fig. 1. *Tetrahymena* Poc5 (TtPoc5) contains evolutionarily conserved Poc5 domains.**

1066 **(A)** Schematics showing conserved organization of centrin-binding repeats (CBRs; gray boxes)  
1067 and the Poc5 box (yellow box) in hPOC5 and TtPoc5. **(B)** Sequence alignment within region  
1068 containing an isolated CBR (CBR1), tandem CBRs (CBR2,3), and the Poc5 box. Identical  
1069 residues shaded in black and similar residues shaded in gray. Asterisks denote conserved  
1070 centrin-binding sequence motif (Ax7LLx3F/Lx2WK/R) residues. **(C)** Sequence logos show AA  
1071 composition within 18 AA sequence motifs (positions 6-23) of hPOC5 and TtPoc5 CBRs plus  
1072 five upstream AAs. Black residues indicate high proportion of hydrophobic AAs at conserved  
1073 positions (marked with asterisks). Hydrophilic residues are indicated in blue and neutral  
1074 residues are indicated in green. **(D)** Multiple sequence alignment of the highly conserved 21  
1075 AA Poc5 box across select Poc5 orthologs.

1076

1077 **Fig. 2. Endogenously tagged Poc5-GFP localizes to assembling BBs. (A)** Live-cell

1078 imaging of C-terminally tagged Poc5-GFP relative to Poc1-mCherry (BB marker) with the  
1079 anterior(A)-posterior(P) axis indicated with an arrow. Poc5-GFP localizes to a subset of cortical  
1080 row BBs (highlighted with boxes) but is not detected in the mature oral apparatus (labeled with  
1081 arrowheads). Scale bar: 10 $\mu$ m. Upper right panels are representative regions of cortical rows  
1082 containing three BB pairs. Poc5-GFP localizes to the anterior (assembling) BBs and is absent  
1083 in the posterior (mature) BBs. Poc5 incorporation can precede that of Poc1 (labeled with  
1084 arrows). Small 1.1  $\mu$ m x 1.2  $\mu$ m panels show representative BB pair for image averaging in  
1085 **(B).** **(B)** Image averaging of Poc5-GFP and Poc1-mCherry signals across 58 cortical row BB  
1086 pairs reveals Poc5-GFP localization exclusively at assembling BBs. The BB scaffolds are  
1087 approximated with 200 nm diameter dashed circles based on the center of the Poc1-mCherry  
1088 signal, reflecting the average diameter of a *Tetrahymena* BB.

1089

1090

1091



1092 **Fig. 3. TtPoc5 is enriched during BB assembly and removed prior to cilia formation.**  
1093 **(A)** Live-cell imaging of endogenously tagged, C-terminal Poc5-GFP during logarithmic growth,  
1094 in starvation, and after release back into growth medium (starve and release). During  
1095 logarithmic growth, BB assembly occurs throughout the cell cycle and low levels of Poc5-GFP  
1096 signal are detected at a single moment (indicated with arrowheads). In starvation, cells are  
1097 arrested in G1 preventing new BB assembly and Poc5-GFP is not detectable. Overnight  
1098 starvation followed by release into growth medium (stimulating new BB assembly) enriches the  
1099 Poc5-GFP signal (marked with arrowheads). **(B,C)** Live-cell imaging of starved and released  
1100 cells with representative sections of cortical rows (marked with dashed boxes) expanded in the  
1101 smaller panels. **(B)** Endogenous Poc5-GFP is co-expressed with Sas6a-mCherry (early  
1102 marker of BB cartwheel structure) to assess the timing of TtPoc5 BB incorporation. Sas6a-  
1103 mCherry labels all BBs whereas Poc5-GFP is only at the anterior BB in a pair. Poc5-GFP  
1104 signal always coincides with Sas6a-mCherry signal, therefore TtPoc5 BB incorporation does  
1105 not precede that of Sas6a. **(C)** Endogenous Poc5-GFP is co-expressed with Poc1-mCherry  
1106 (BB marker) and RSPH9-mCherry (evenly labels ciliary axonemes) to assess the timing of  
1107 Poc5 removal from maturing BBs. Poc5-GFP removal precedes cilia formation since Poc5-  
1108 GFP-positive BBs are not ciliated (indicated with arrowheads) and maturing, non-ciliated BBs  
1109 with detectable Poc1-mCherry (highlighted with an arrow) can be devoid of Poc5-GFP signal.  
1110 Scale bars: 10µm.

1111  
1112 **Fig. 4. poc5Δ cells are viable and display overproduced BBs but fewer cilia.**  
1113 **(A)** Schematic outlining the homologous recombination strategy for generating a complete  
1114 micronuclear knockout of *TtPOC5*, where the *TtPOC5 ORF* is replaced with a codon-optimized  
1115 NEO2 (coNEO2) cassette for drug selection. **(B)** PCR confirming success of the knockout  
1116 strategy, with only wild-type (WT) cells containing the *TtPOC5 ORF* and only *poc5Δ* cells  
1117 containing the coNEO2 cassette. **(C)** Growth curves for WT and *poc5Δ* cells grown at either  
1118 30°C or 37°C for eight hours in SPP medium. Cell density (cells/ml) measurements are  
1119 gathered at the initiation of the experiment (cultures starting at  $0.5 \times 10^5$  cells/ml), and four and  
1120 eight hours after initiation.  $n=3$  analyzed samples per strain and incubation temperature. Error  
1121 bars: SD. **(D)** Representative WT and *poc5Δ* cells stained with an antibody against Cen1  
1122 (labels BBs) after incubation at either room-temperature (RT), 30°C, or 37°C. Loss of TtPoc5

1123 does not disrupt the organization/orientation of cortical row BBs. Bottom panel is  
1124 representative *poc5Δ* rescue (Rescue) cell at 30°C with no CdCl<sub>2</sub> induction (N.I.) due to  
1125 leakiness of the *MTT1* promoter, where *TtPOC5* is reincorporated in *poc5Δ* cells through  
1126 transformed *MTT1pr-GFP-Poc5*. Scale bars: 10μm. **(E)** BB density quantification (average  
1127 BBs/10 μm) for WT and *poc5Δ* cells at RT, 30°C, and 37°C. Significant BB overproduction is  
1128 observed in *poc5Δ* cells at all tested growth temperatures and rescued with *MTT1pr-GFP-*  
1129 *Poc5* to near WT levels at 30°C. *n*=300 total counts (5 counts per cell across 20 cells, in  
1130 triplicate) per condition. Error bars: SEM. Student's t-test calculation used to derive *P* values.  
1131 \*\*\*, *P* < 0.001. **(F)** Representative 10 μm sections of cortical rows with an antibody against  
1132 polyglutamylation (labels ciliary axonemes and BBs). **(G)** Ciliary density quantification (average  
1133 # cilia/10 μm) for WT and *poc5Δ* cells at 30°C reveals significantly reduced ciliary density in  
1134 *poc5Δ* cells that is rescued with *TtPOC5* reincorporation. *n*=100 total counts per condition.  
1135 Error bars: SEM. Student's t-test calculation used to derive *P* values. \*\*\*, *P* < 0.001.

1136

1137 **Fig. 5. Loss of both TtPoc5 and Sfr1 results in cell lethality and exacerbated**  
1138 **overproduction of defective BBs.** A previously characterized centrin-binding protein, Sfr1, is  
1139 the second best hPOC5 ortholog in *Tetrahymena* genome BLAST search, despite lacking the  
1140 Poc5 box (Heydeck et al., 2016). Beyond sequence homology, Sfr1 has a similar role in  
1141 modulating BB production, prompting the generation of double knockout (*poc5Δ;sfr1Δ*) cells  
1142 using established methods (Hai et al., 2000). **(A)** Representative control mated WT, double  
1143 heterozygous (het), and double knockout (KO) cells stained with anti-Cen1 antibody after 24  
1144 hours and 48 hours of drug selection following mating. Double KO cell death within 48 hours  
1145 post drug selection is not due to a lack of drug resistance since double het. cells are viable  
1146 after 48 hours in drug. Drug selection is effective since mated WT cells that do not carry drug  
1147 resistance cassettes die after 48 hours in drug. Scale bars: 10μm. **(B)** BB density quantification  
1148 (average BBs/10 μm) at 24 hours. Double KO cells have significantly higher BB density relative  
1149 to mated WT and double het. cells. *n*=90 total counts (3 counts per cell across 15 cells, in 2  
1150 biological replicates). Error bars: SEM. Student's t-test calculation used to derive *P* values. \*\*\*,  
1151 *P* < 0.001. **(C,D)** Electron tomography of double KO BBs. **(C)** Cross-sectional view showing  
1152 normal *Tetrahymena* BB accessory structures (kinetodesmal fiber (KD), transverse  
1153 microtubules (tMT), post ciliary microtubules (pcMT)) and intact proximal cartwheel (CW).

1154 Scale bar: 100nm. **(D)** Longitudinal views showing BBs that do not template cilia and have  
1155 varying degrees of transition zone (TZ) formation (left and middle panels). Right panel shows  
1156 BB with a templated cilium and a morphologically normal TZ (arrow indicates electron dense  
1157 acrosome). See Movie 1. Scale bars: 100nm.

1158

1159 **Fig. S1. RT-PCR confirmation of *poc5Δ* cells.** RT-PCR analysis using isolated RNA from  
1160 WT and *poc5Δ* cells confirms *TtPOC5* KO and supplements PCR validation (Fig. 4B). *TtPOC5*  
1161 expression is only observed in WT cells and *coNEO2* expression is only in *poc5Δ* cells.  
1162 Amplified RT-PCR products specific to *TtPOC5* and *coNEO2* are indicated with red asterisks.

1163

1164 **Fig. S2. CdCl<sub>2</sub>-induced *MTT1pr*-mCherry-Poc5 overexpression leads to aberrant TtPoc5**  
1165 **BB localization.** Due to leakiness of the *MTT1* promoter, exogenously expressed *MTT1pr*-  
1166 mCherry-Poc5 BB localization (WT background) is assessed with both no CdCl<sub>2</sub> induction  
1167 (N.I.) and CdCl<sub>2</sub>-induced overexpression. *MTT1pr*-mCherry-Poc5 (N.I.) localizes to a subset of  
1168 cortical row BBs (marked with arrowheads), similar to endogenously expressed Poc5-GFP  
1169 (Fig. 2A; Fig. 3A). In contrast, *MTT1pr*-mCherry-Poc5 (CdCl<sub>2</sub> induction) appears to localize to  
1170 all cortical row BBs yet remains absent in the oral apparatus. TtPoc5-positive fibers (labeled  
1171 with arrows) are evident with CdCl<sub>2</sub>-induced *MTT1pr*-mCherry-Poc5 overexpression, as seen  
1172 previously with Poc5 overexpression (Dantas et al., 2013).

1173

1174 **Fig. S3. PCR confirmation of drug-resistant cells for generation of *poc5Δ*;*sfr1Δ* cells.**  
1175 Following paromomycin drug selection, PCR confirms cells with germline micronuclei  
1176 containing codon-optimized NEO2 (*coNEO2*) in the *TtPOC5* locus and NEO2 in the *SFR1*  
1177 locus (marked with asterisks). These cells were mated together to generate *poc5Δ*;*sfr1Δ* cells.  
1178 Notably, one drug-resistant clone is identified (#3) that lacks NEO2 in the *SFR1* locus.

1179

1180 **Fig. S4. Ultrastructural BB maturation defects with loss of both TtPoc5 and Sfr1.** Cross-  
1181 sectional views from serial EM tomographic slices collected at the distal end of WT and double  
1182 KO BBs. In double KO BBs, defective TZ formation is apparent, suggesting that loss of  
1183 TtPoc5 and Sfr1 results in BB maturation defects. Double KO BBs lack characteristic TZ and  
1184 ciliary axonemal features, including a typical transition from triplet-to-doublet microtubules

1185 (marked with arrows) and an electron-dense axosome containing a central microtubule pair  
1186 (labelled with arrowheads). See Movies 2,3. Scale bars:100 nm.

1187

1188 **Movie 1. Double KO BBs have defective TZ formation.** Movie of serial EM tomographic  
1189 slices through a portion of a double KO cell containing five BBs. Longitudinal view shows BBs  
1190 with varying degrees of TZ formation. Still images from this volume presented in Fig. 5. Scale  
1191 bar: 200nm.

1192

1193 **Movie 2. Serial EM tomographic slices through morphologically normal TZ.** Cross-  
1194 sectional view of WT TZ with a typical transition from triplet-to-doublet microtubules, an  
1195 electron dense axosome, and central pair microtubules at the distal end. Still images from this  
1196 volume presented in Fig. S4. Scale bar: 200nm.

1197

1198 **Movie 3. Serial EM tomographic slices through defective TZ.** Cross-sectional view of a  
1199 double KO TZ with apparently defective TZ formation and no detectable cilium. Still images  
1200 from this volume presented in Fig. S4. Scale bar: 200nm.

Figure 1

A

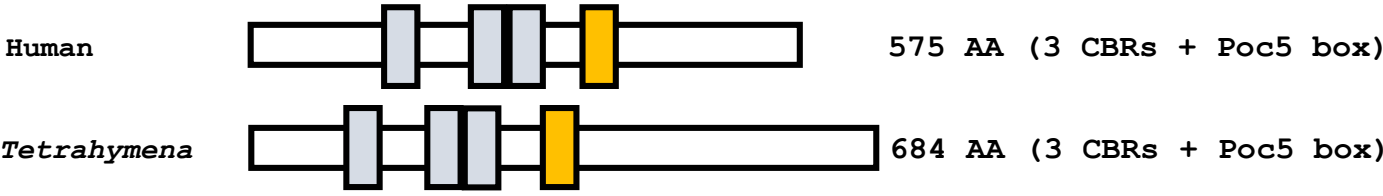

B

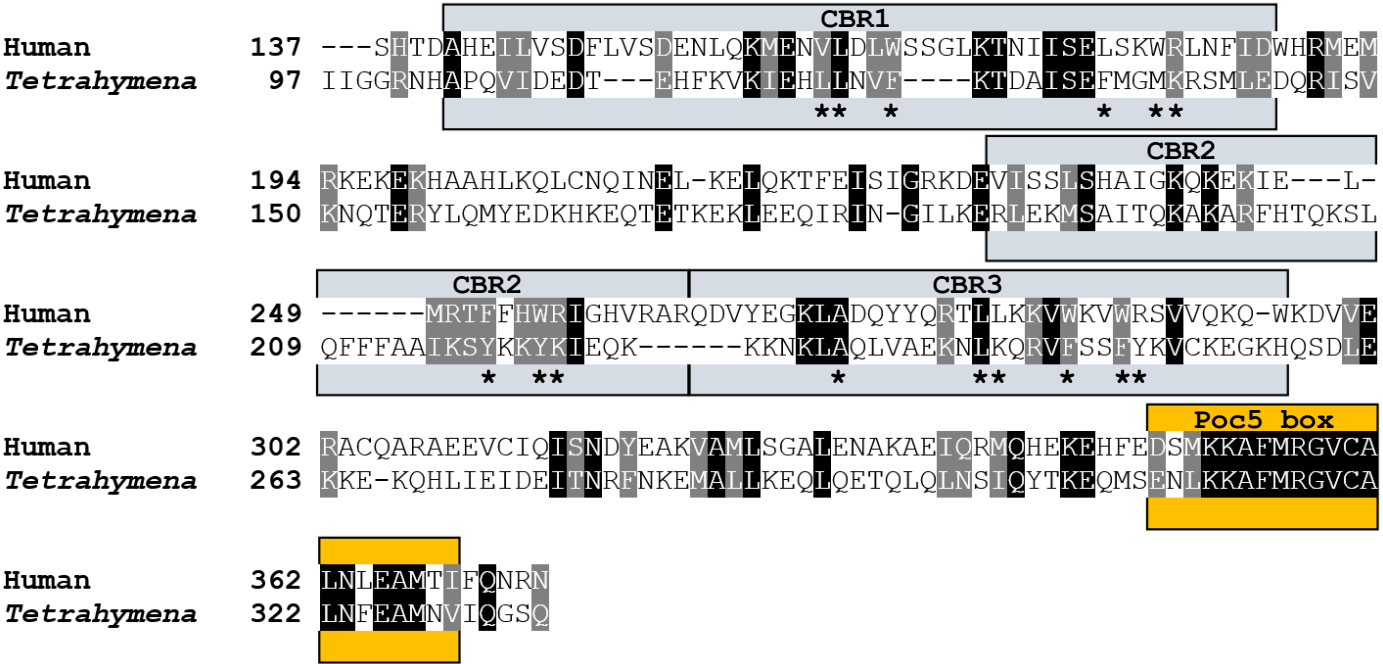

C

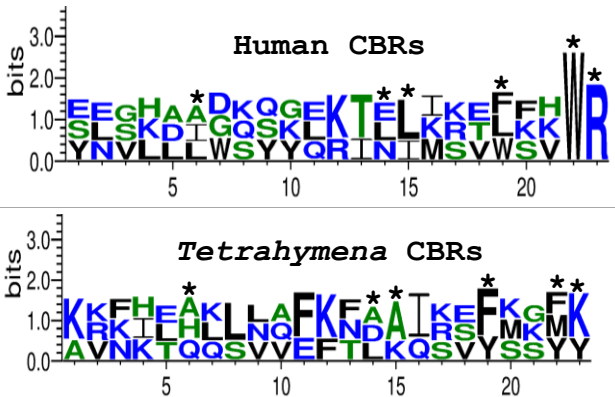

D

**Poc5 box**

|               |     |     |          |      |      |    |     |
|---------------|-----|-----|----------|------|------|----|-----|
| Human         | 349 | DSM | KKAFMRGV | CALN | LEAM | TI | 369 |
| Mouse         | 333 | DSM | KKAFMRGV | CALN | LEAM | TI | 353 |
| Zebrafish     | 343 | DSM | KKAFMRGV | CALN | LEAL | SM | 363 |
| Chlamydomonas | 295 | DNM | KRAFMRGV | CALN | LEAM | NV | 315 |
| Paramecium    | 288 | ENL | KRAFMRGV | CALN | LEAM | NV | 308 |
| Tetrahymena   | 309 | ENL | KKAFMRGV | CALN | LEAM | NV | 329 |

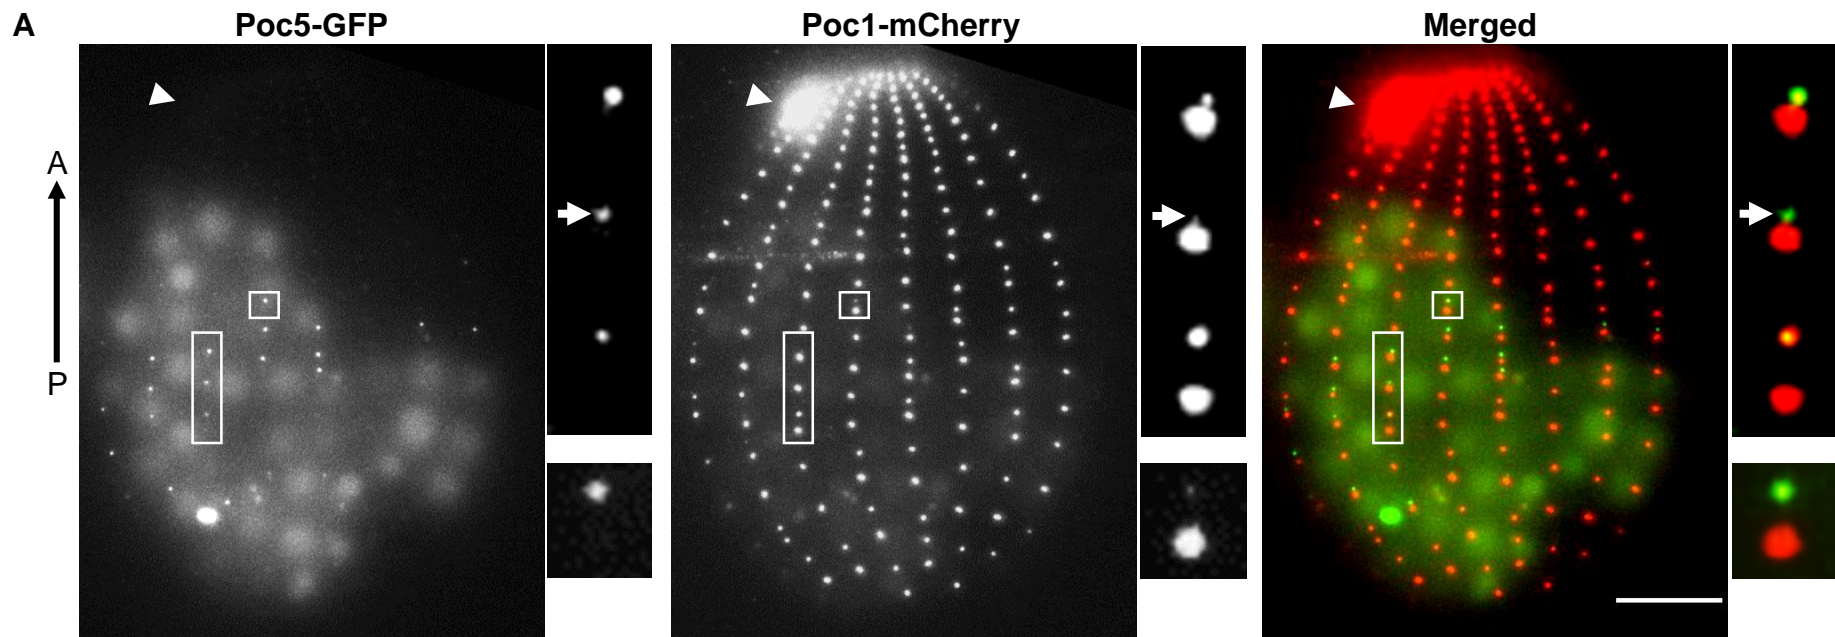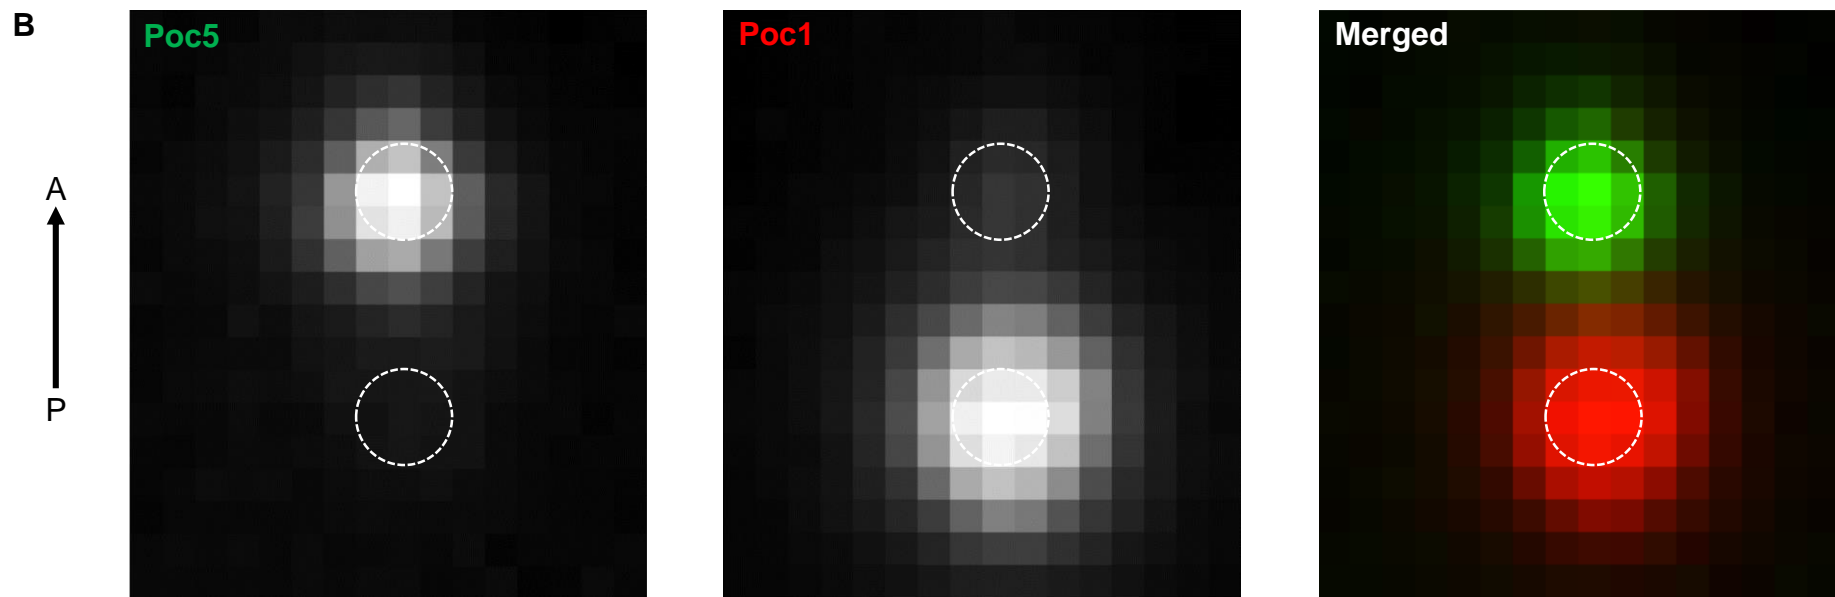

**Figure 2**

**Figure 3**

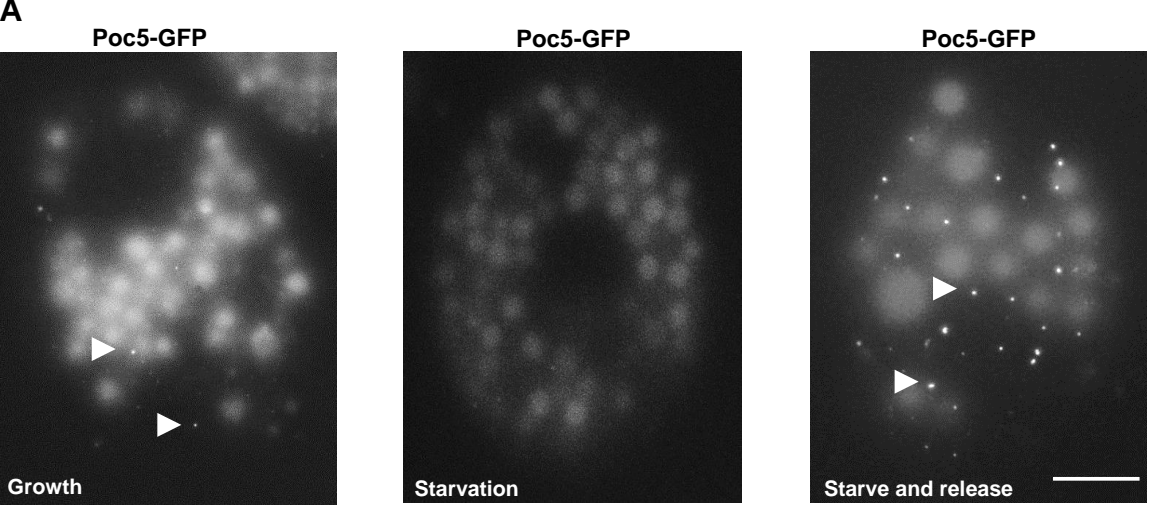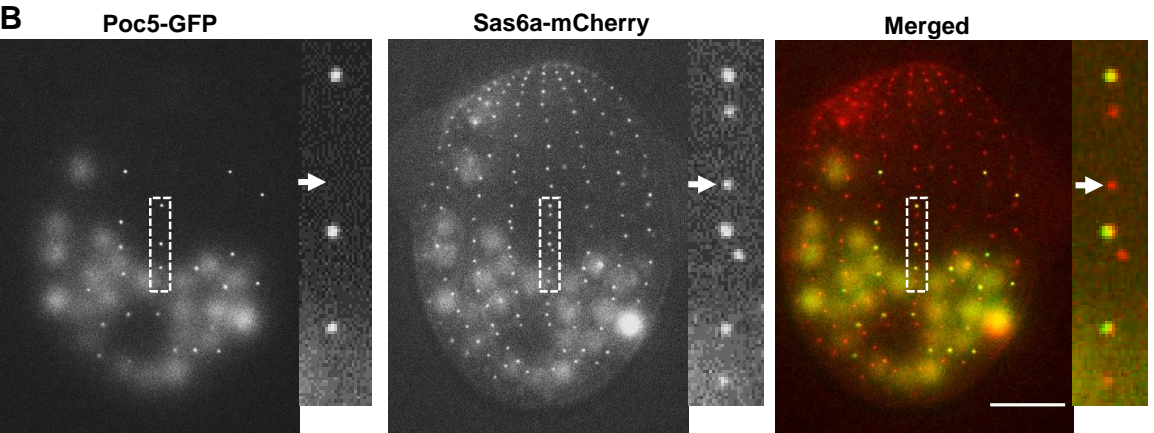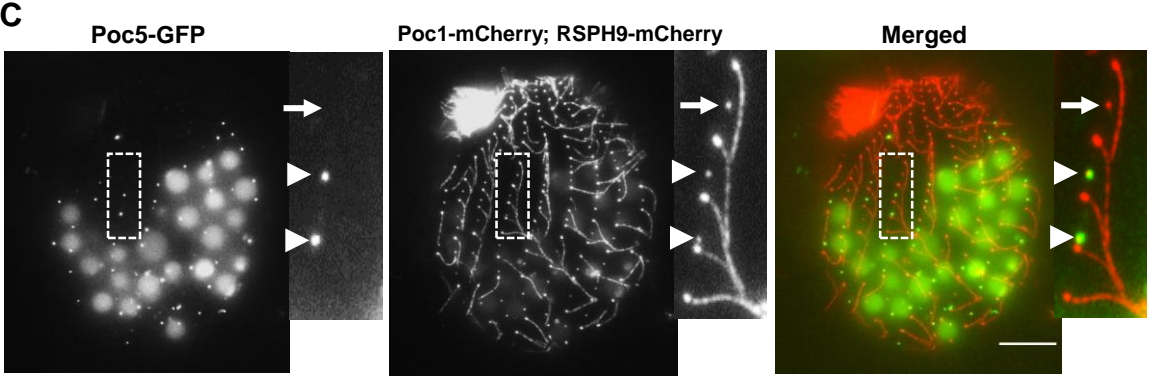

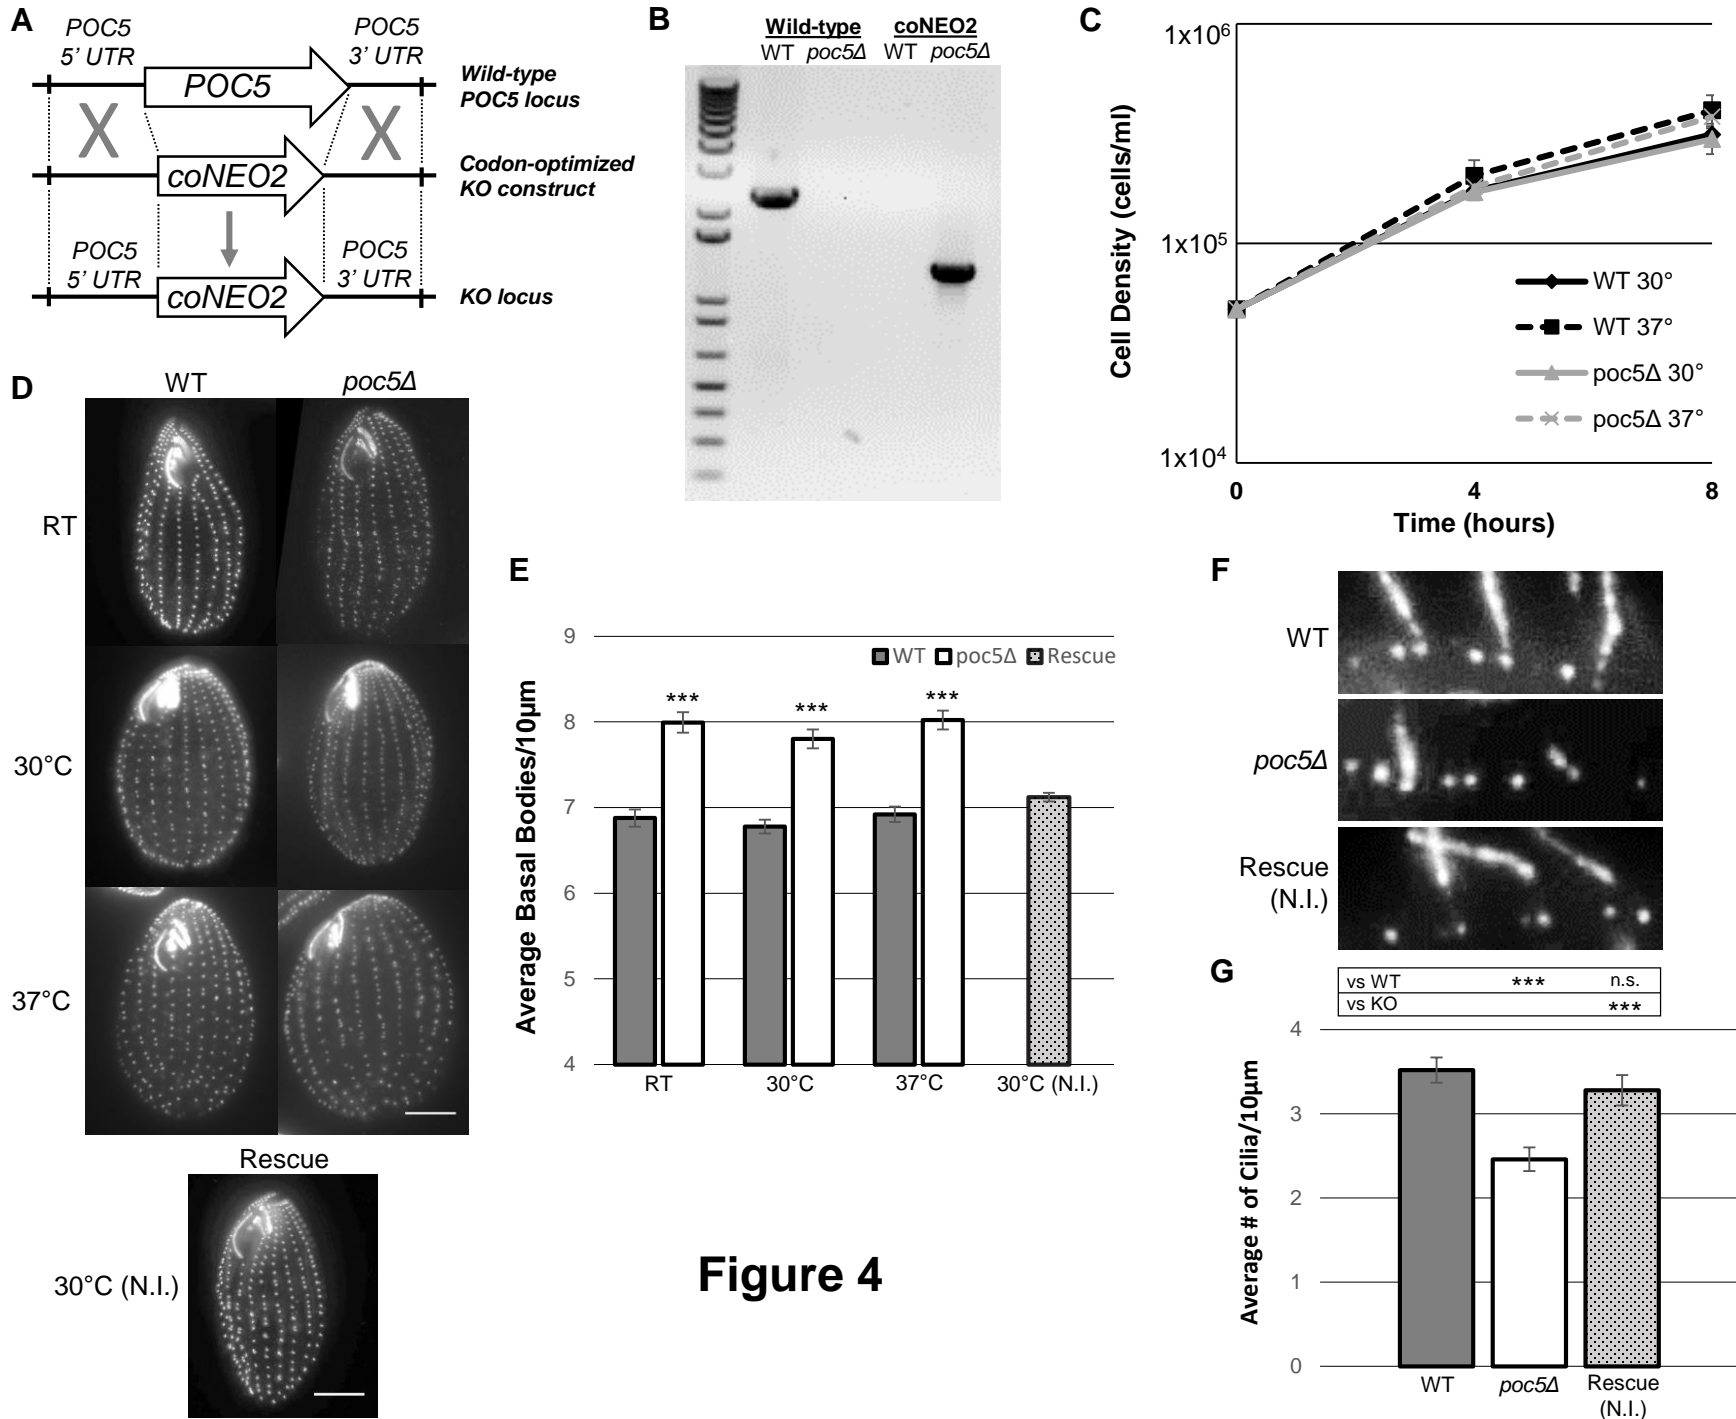

**Figure 4**



**Figure 5****A**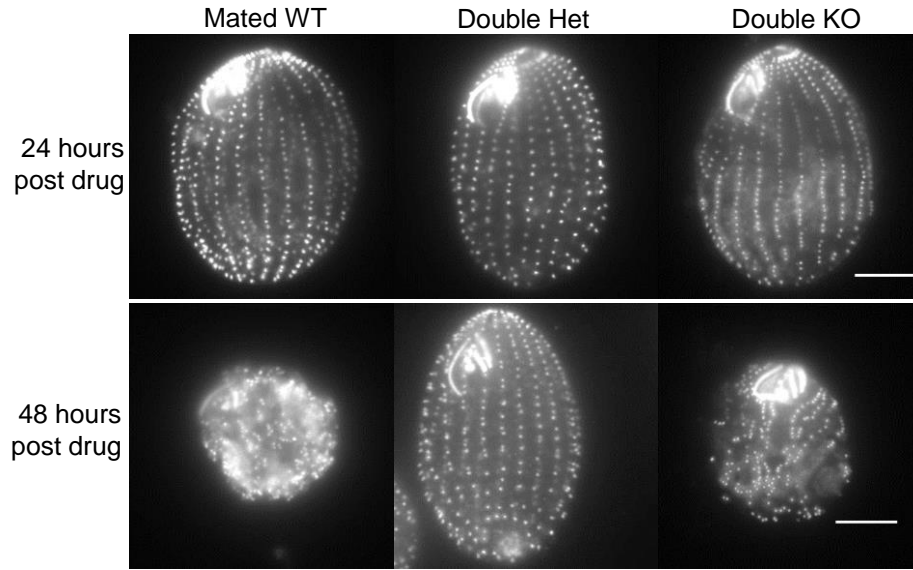**B**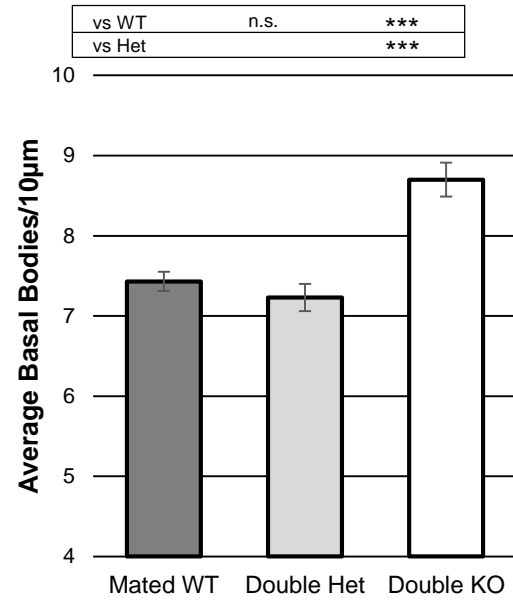**C**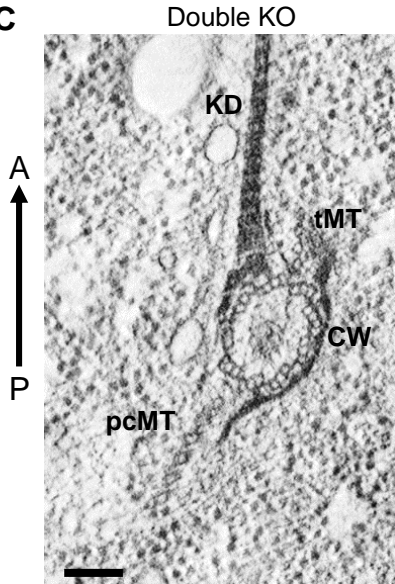**D**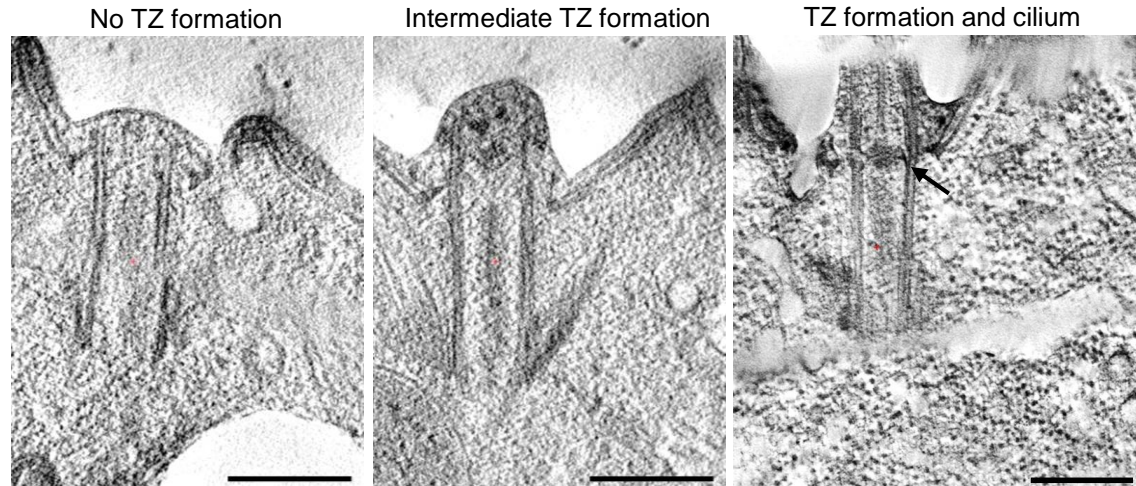

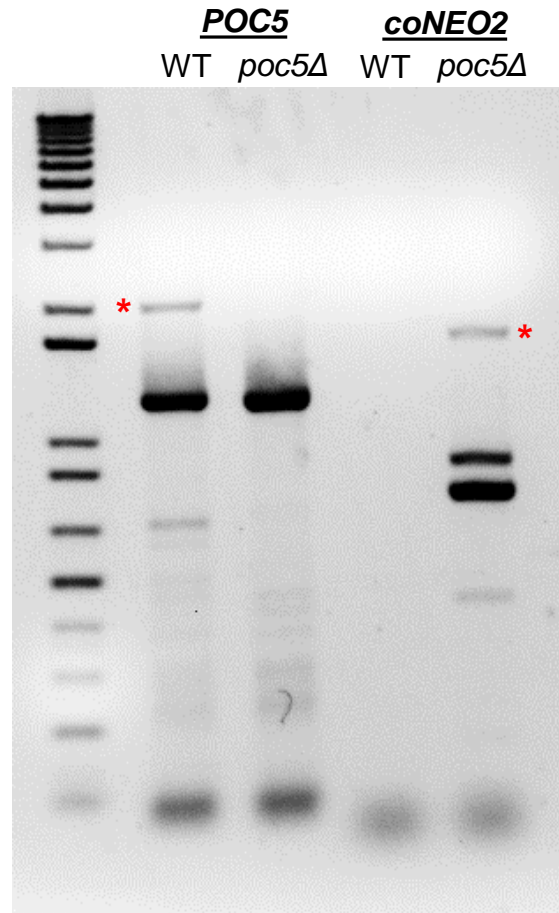

**Supplementary material Figure S1**

*MTT1pr*-mCherry-Poc5 in WT cells

No CdCl<sub>2</sub> induction (N.I.)

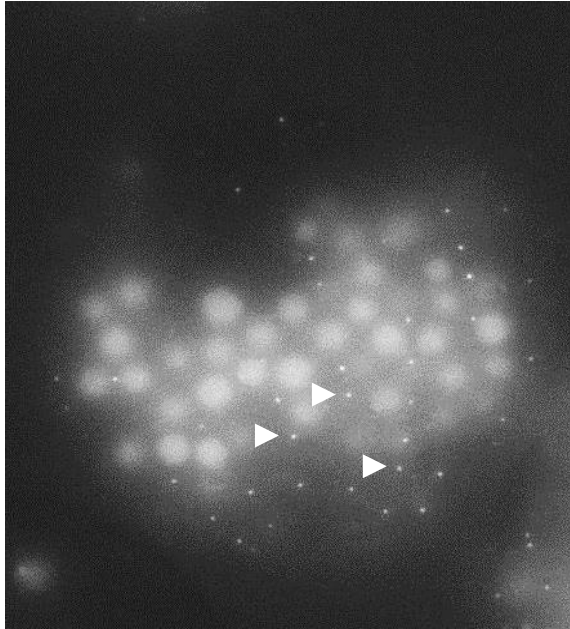

+ CdCl<sub>2</sub> induction

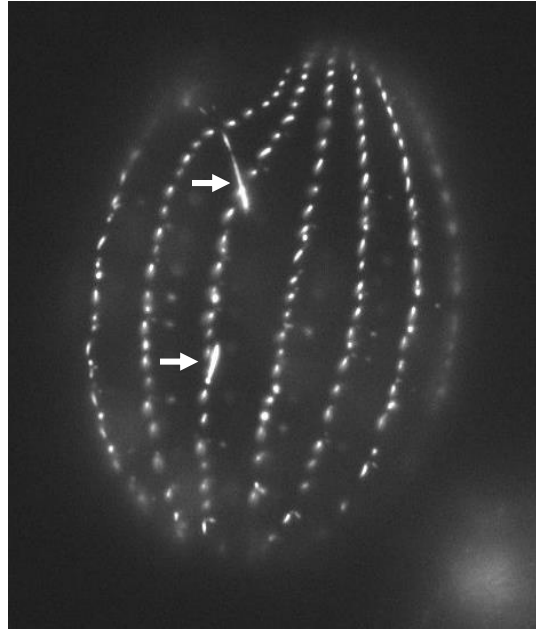

**Supplementary material Figure S2**

PCR detection of coNEO2 in *POC5* locus

1 2 3 4 5

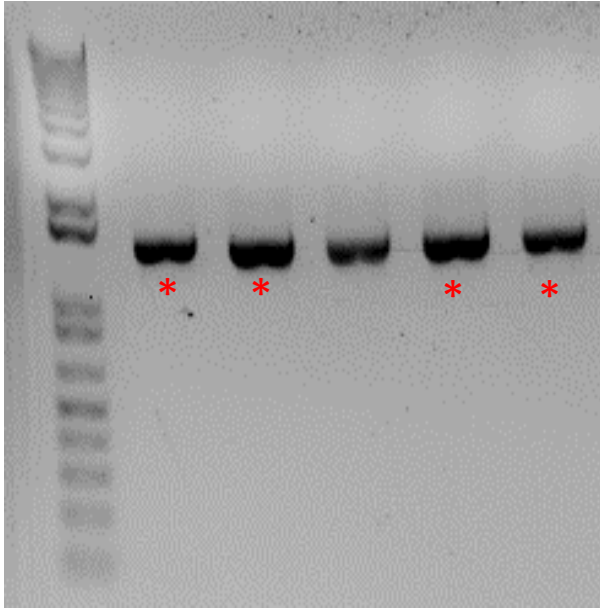

PCR detection of NEO in *SFR1* locus

1 2 3 4 5

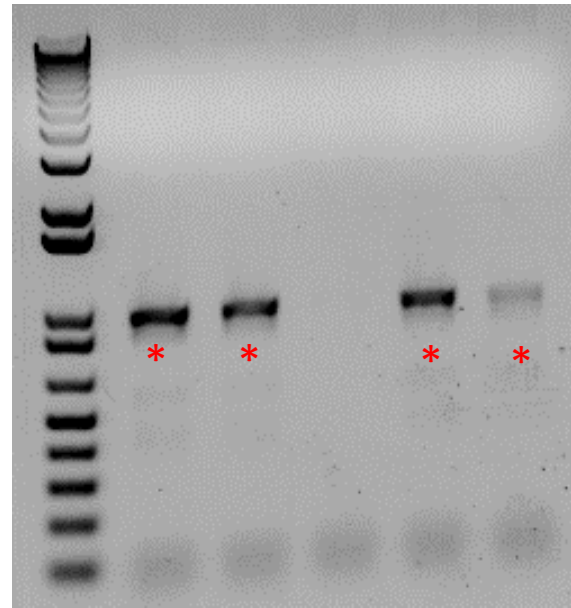

Supplementary material Figure S3

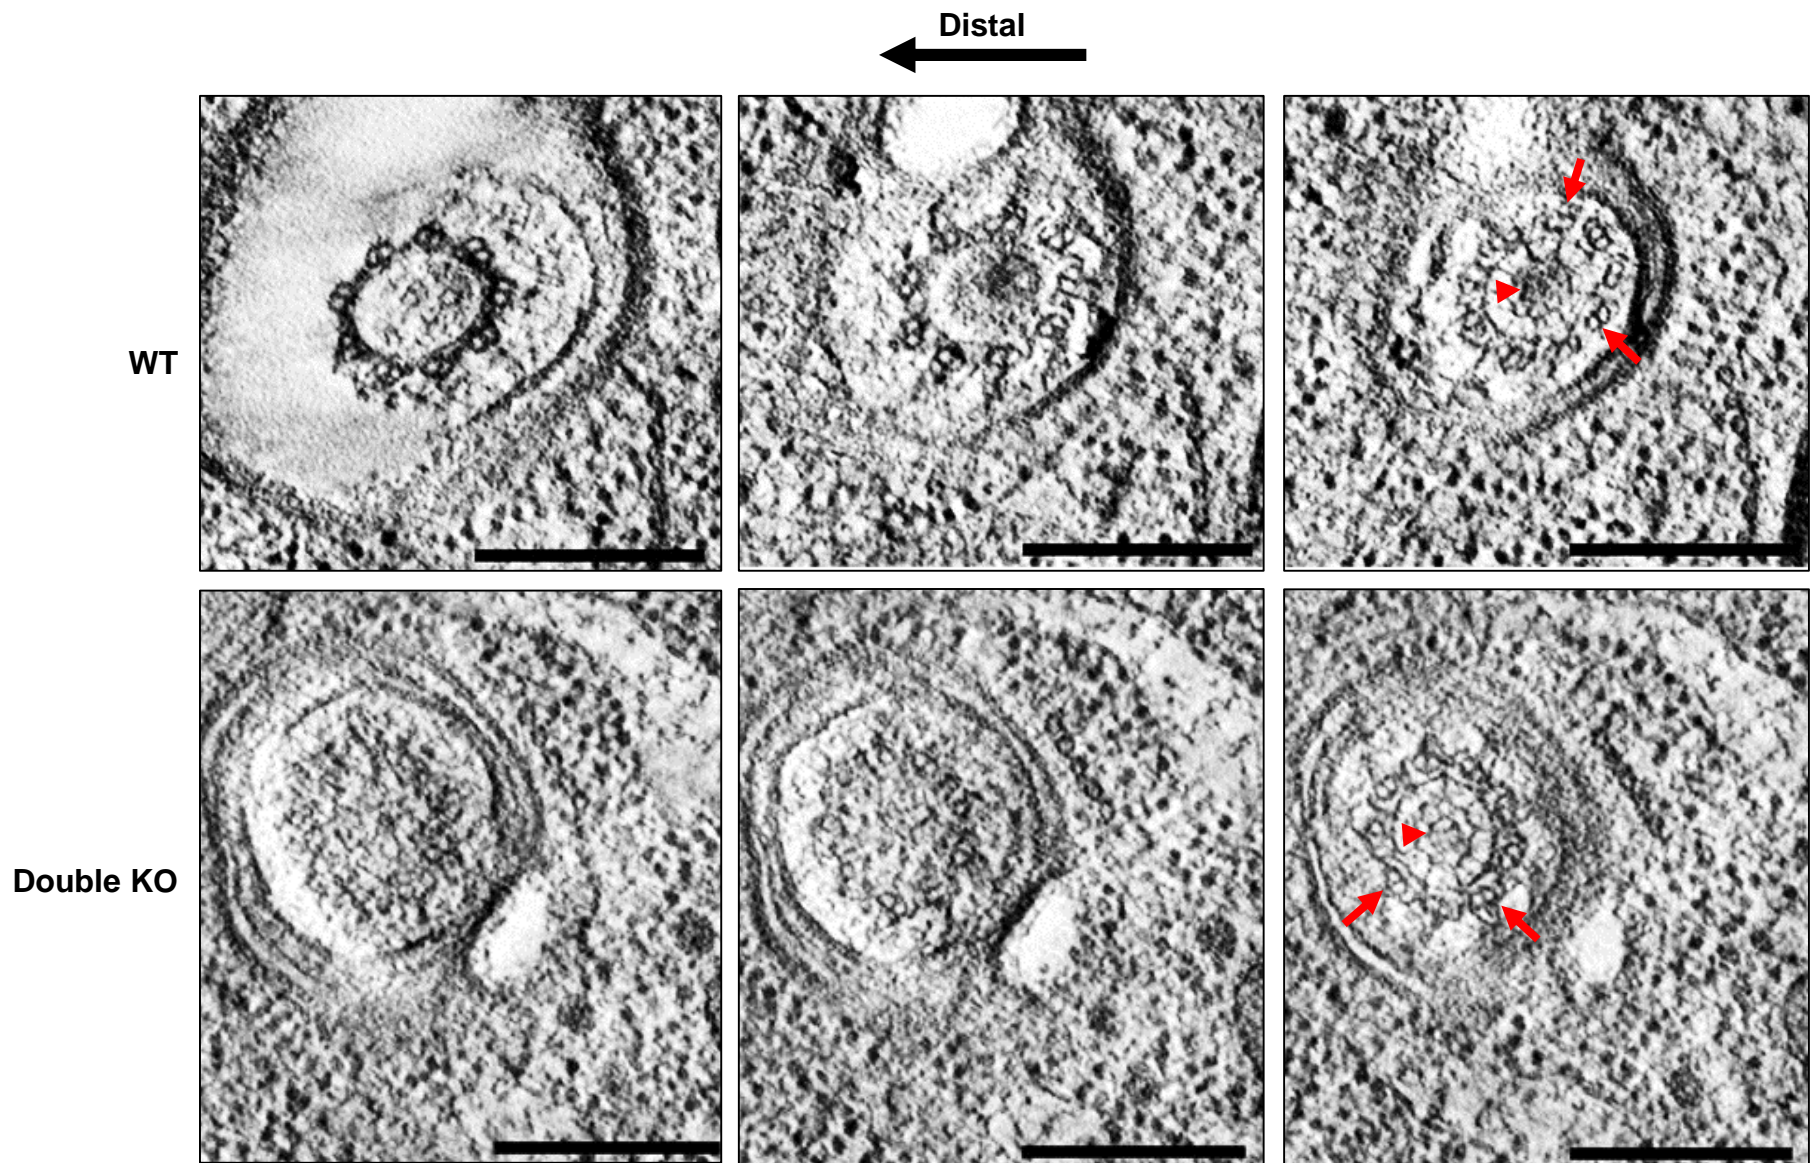

**Supplementary material Figure S4**
